# Supplementary material for: Luminescent early-late-hetero-tetranuclear group IV – Au(i) bisamidinate complexes
Source: Royal Society of Chemistry journal article supplement (doi:10.1039/d2dt00458e), 2022-01-01
Supplement: d2dt00458e1.pdf [file d2dt00458e1.pdf]

## Table of content

|                                                              |     |
|--------------------------------------------------------------|-----|
| I. Characterization .....                                    | S2  |
| General considerations .....                                 | S2  |
| Nuclear magnetic resonance spectroscopy (NMR) .....          | S2  |
| Infrared (IR) spectroscopy.....                              | S2  |
| Raman spectroscopy .....                                     | S2  |
| Elemental analysis .....                                     | S3  |
| Single crystal X-ray diffraction.....                        | S3  |
| Photoluminescence measurements .....                         | S3  |
| Quantum chemical calculations .....                          | S4  |
| II. Syntheses .....                                          | S5  |
| [ $\{CICp_2TiC\equiv CC(NDipp)_2\}Au_2$ ] ( <b>1</b> ) ..... | S5  |
| [ $\{CICp_2ZrC\equiv CC(NDipp)_2\}Au_2$ ] ( <b>2</b> ) ..... | S6  |
| III. NMR Measurements.....                                   | S7  |
| III. IR Measurements .....                                   | S9  |
| IV. Raman measurements .....                                 | S10 |
| VI. Single crystal X-ray diffraction data .....              | S11 |
| VII. Photoluminescence data .....                            | S13 |
| VIII. UV-Vis Spectra .....                                   | S16 |
| IX. Quantum Chemical Calculations .....                      | S17 |
| X. References .....                                          | S36 |

# Supplementary Information

## I. Characterization

### General considerations

All manipulations of air-sensitive materials were performed under the rigorous exclusion of oxygen and moisture in flame-dried Schlenk-type glassware either on a dual manifold Schlenk line, interfaced to a high vacuum ( $10^{-3}$  torr) line, or in an argon-filled MBraun glove box. Hydrocarbon solvents (toluene & *n*-pentane) were dried by using an MBraun solvent purification system (SPS-800), degassed and stored under vacuo. Tetrahydrofuran was distilled under nitrogen from potassium benzophenone-ketyl before storage over 4 Å molecular sieves. The *n*-butyllithium solution, titanocene dichloride and zirconocene dichloride were purchased from Sigma-Aldrich and were used as received.  $[\{\text{HC}\equiv\text{CC}(\text{NDipp})_2\}_2\text{Au}_2]^{1,2}$  was prepared according to literature.

### Nuclear magnetic resonance spectroscopy (NMR)

NMR spectra were recorded on a BrukerAvance II 300 MHz or Avance 400 MHz. Chemical shifts are expressed in parts per million (ppm) and referenced on characteristic solvent resonances as internal standards [7.16 ppm ( $^1\text{H}$ ) and 128.06 ppm ( $^{13}\text{C}$ ); thf- $d_8$ : 1.730 ppm ( $^1\text{H}$ ) and 25.370 ppm ( $^{13}\text{C}$ )] and are reported relative to tetramethylsilane.  $^1\text{H}$ -NMR are reported as follows: chemical shift ( $\delta$  in ppm), multiplicity (s for singlet, d for doublet, q for quartet, m for multiplet), coupling constant(s) (Hz), number of protons (concluded from the integrals), specific assignment (Ar for aromatic, Ph for phenyl, Cp for cyclopentadienyl, *i* for ipso, *o* for ortho, *m* for meta, *p* for para).  $^{13}\text{C}\{^1\text{H}\}$  NMR spectra are reported in terms of chemical shift and specific assignment.

### Infrared (IR) spectroscopy

IR spectra were obtained on a Bruker Tensor 37 FTIR spectrometer equipped with a room temperature DLATGS detector, a diamond ATR (attenuated total reflection) unit, and a nitrogen flushed chamber. In terms of their intensity, the signals were classified into the categories vs = very strong, s = strong, m = medium, w = weak and vw = very weak.

### Raman spectroscopy

Raman spectra were recorded using a MultiRam spectrometer (Bruker). In terms of their intensity, the signals were classified into the categories vs = very strong, s = strong, m = medium, w = weak and vw = very weak.

## Supplementary Information

### Elemental analysis

Elemental analyses were carried out with a Vario Micro Cube (Elementar Analysensysteme GmbH).

### Single crystal X-ray diffraction

A suitable crystal was covered in mineral oil (Aldrich) and mounted on a glass fiber. The crystal was transferred directly to the cold stream of a STOE IPDS 2 or a STOE StadiVari diffractometer. All structures were solved by using the program SHELXS/T<sup>3, 4</sup> and Olex2.<sup>5</sup> The remaining non-hydrogen atoms were located from successive difference Fourier map calculations. The refinements were carried out by using full-matrix least-squares techniques on  $F^2$  by using the program SHELXL.<sup>3</sup> In each case, the locations of the largest peaks in the final difference Fourier map calculations, as well as the magnitude of the residual electron densities, were of no chemical significance.

Crystallographic data (excluding structure factors) for the structures reported in this paper have been deposited with the Cambridge Crystallographic Data Centre as a supplementary publication no. 2151930-2151931. Copies of the data can be obtained free of charge on application to CCDC, 12 Union Road, Cambridge CB21EZ, UK (fax: +(44)1223-336-033; email: [deposit@ccdc.cam.ac.uk](mailto:deposit@ccdc.cam.ac.uk)).

In the structure of compound **1** and **2** some of the (multiple) disordered parts were refined isotropically, since unfavorable overlays in the case of an anisotropic refinement would otherwise have required quite strict restraints & constraints without any additional gain in information.

### Photoluminescence measurements

PL measurements were performed with a Horiba Jobin Yvon Fluorolog-322 spectrometer equipped with a closed-cycle optical cryostat (Leybold) operating within a temperature range of 15-300 K. Hamamatsu R9910 and R5509 photomultipliers were used as detectors for the emission spectral ranges of about 300-830 and 500-1380 nm, respectively. The solid samples (crystalline powders) were measured as dispersions in a thin layer of viscous heavy mineral oil (Sigma Aldrich) placed between two 1 mm quartz plates (Material: Spectrosil® 2000). The latter were mounted on the cold finger of the cryostat. All emission spectra were corrected for the wavelength-dependent response of the spectrometer and detector (in relative photon flux units). Emission decay traces were recorded by connecting a photomultiplier to a 500 MHz LeCroy LT322 oscilloscope (via a 50, 500, 2.500 or 10.000 Ohm load depending on the decay time scale) and using a nitrogen laser (~2 nsec, ~5  $\mu$ J per pulse) for pulsed excitation at 337 nm. Several hundred traces were usually acquired and averaged. PL

## Supplementary Information

efficiencies of solid complexes at ambient temperature were determined using an integrating sphere out of optical PTFE, which was installed into the sample chamber of the spectrometer, according to the method of de Mello *et al.*<sup>6</sup> The uncertainty of this measurement was estimated to be  $\pm 10\%$ .

### Quantum chemical calculations

Quantum chemical calculations on  $\text{Ti}_2\text{Au}_2$  and  $\text{Zr}_2\text{Au}_2$  complexes **1** and **2** as well as on the structurally related  $\text{Au}_2\text{Au}_2$  complex - tetranuclear gold(I) bisethynylamidinate  $[\{\text{Ph}_3\text{PAu}_2\text{MC}\equiv\text{CC}(\text{NDipp})_2\}_2\text{Au}_2]^2$  - were performed with the DFT/TDDFT program package TURBOMOLE<sup>7</sup>, using BP86 functional<sup>8-10</sup> as well as Grimme D3 dispersion correction<sup>11</sup> and def-SV(P) basis sets<sup>12</sup>. The optimized geometries of all three complexes were found to possess  $C_1$  symmetry. The phosphorescence energies were obtained within the  $\Delta$ -SCF method for the structure parameters optimized for the triplet state. Table S3 compares the calculated energies with those observed experimentally (for crystalline samples). The theory underestimates the absolute emission energies by about 0.3 eV for **1** and  $\text{Au}_2\text{Au}_2$  complexes and by 0.5 eV for **2**. Accordingly, however, a trend for the relative energies among these three complexes is reproduced much better, within 0.2 eV.

## Supplementary Information

### II. Syntheses

#### **[{ClCp<sub>2</sub>TiC≡CC(NDipp)<sub>2</sub>}Au<sub>2</sub>] (1)**

The complex  $[\{\text{HC}\equiv\text{CC}(\text{NDipp})_2\}_2\text{Au}_2]$  (200 mg, 0.17 mmol, 1.00 eq.) was dissolved in thf (40 mL) and cooled to -78 °C. A 2.5 molar *n*-butyllithium solution in *n*-hexane (144 μL, 0.36 mmol, 2.10 eq.) was added, whereupon the cyan luminescence (observed by irradiation with a conventional UV-Lamp,  $\lambda_{\text{exc}} = 365\text{nm}$ ) of the solution immediately changed color to deep blue. The reaction mixture was stirred for 30 min at -78 °C. Subsequently, titanocene dichloride (85 mg, 0.34 mmol, 2.00 eq.) was added, whereupon the luminescence of the solution immediately vanished. The resulting red solution was warmed to ambient temperature under stirring overnight. The solvent was evaporated and the remaining solid was extracted with 15 mL toluene and was filtered through a syringe filter. After evaporation of the solvent and drying under vacuum the product was obtained as a dark red solid. Red prism shaped single crystals suitable for X-ray analysis were obtained by recrystallization from hot toluene. Yield: 220 mg (81 %)

<sup>1</sup>H NMR (300 MHz, CDCl<sub>3</sub>):  $\delta$  [ppm] = 7.11 (s, 12 H, Ph-*H*), 5.66 (s, 20 H, Cp-*H*), 3.69 (hept, <sup>3</sup>J<sub>HH</sub> = 6.7 Hz, 8 H, CH), 1.34 (d, <sup>3</sup>J<sub>HH</sub> = 6.8 Hz, 24 H, CH<sub>3</sub>), 1.23 (d, <sup>3</sup>J<sub>HH</sub> = 6.8 Hz, 24 H, CH<sub>3</sub>). – <sup>13</sup>C{<sup>1</sup>H} NMR (75 MHz, CDCl<sub>3</sub>):  $\delta$  [ppm] = 159.5 (CN<sub>2</sub>), 154.8 (C≡C), 146.0 (*i*-Ph-C), 144.2 (*o*-Ph-C), 125.6 (*p*-Ph-CH), 123.3 (*m*-Ph-CH), 120.2 (C≡C), 116.2 (Cp-CH), 27.8 (CH), 24.4 (CH<sub>3</sub>), 24.5 (CH<sub>3</sub>). – IR (ATR):  $\tilde{\nu}$  [cm<sup>-1</sup>] = 2958 (w), 2865 (vw), 2088 (vw), 1484 (vs), 1441 (m), 1369 (m), 1358 (m), 1327 (m), 1319 (m), 1253 (w), 1215 (vw), 1183 (vw), 1100 (vw), 1061 (vw), 1017 (w), 959 (vw), 937 (vw), 826 (vw), 817 (vs), 794 (m), 780 (m), 748 (w), 723 (w), 696 (w), 470 (w), 422 (w). – Raman (solid state):  $\tilde{\nu}$  [cm<sup>-1</sup>] = 3130 (vw), 3059 (vw), 2960 (vw), 2933 (vw), 2904 (vw), 2867 (vw), 2088 (vs), 1589 (vw), 1443 (vw), 1369 (w), 1268 (vw), 1133 (w), 450 (vw), 347 (vw), 287 (w), 189 (vw). – **Elemental Analysis**: calcd. (%) for [C<sub>74</sub>H<sub>88</sub>Au<sub>2</sub>Cl<sub>2</sub>N<sub>4</sub>Ti<sub>2</sub>] (1594.11): C 55.76, H 5.56, N 3.51; found: C 56.39, H 5.28, N 3.39.

## Supplementary Information

### **[{ClCp<sub>2</sub>ZrC≡CC(NDipp)<sub>2</sub>}]<sub>2</sub>Au<sub>2</sub> (2)**

200 mg of **1** (0.17 mmol, 1.00 eq.) were dissolved in 40 mL thf and cooled to -78 °C. A 2.5 molar *n*-butyllithium solution in *n*-hexane (144 μL, 23 mg, 0.36 mmol, 2.10 eq.) was added whereupon the cyan luminescence of the solution immediately changed emission to deep blue. The reaction mixture was stirred for 30 min at -78 °C subsequently a solution of 100 mg of zirconocene dichloride (0.34 mmol, 2.00 eq.) in thf (10 mL) was added, whereupon the luminescence of the solution immediately changed color to yellow. The solution was warmed to ambient temperature under stirring overnight. After evaporation of the solvent the remaining solid was extracted with toluene (20 mL) and was quickly filtered through a thoroughly dried syringe filter. The yellow solution was reduced to approximately 5-10 mL yellow crystals of the title compound were obtained after storage at -30 °C over 3 days. The product was obtained as a yellow solid after decantation of the mother liquor and drying under vacuum. Single crystals suitable for X-ray analysis were grown by layering a concentrated toluene solution with *n*-pentane. Yield: 181 mg (63 %)

<sup>1</sup>H NMR (400 MHz, C<sub>6</sub>D<sub>6</sub>): δ [ppm] = 7.13 (s, 12 H, Ph-*H*), 5.46 (s, 20 H, Cp-*H*), 4.06 (hept, <sup>3</sup>J<sub>HH</sub> = 7.0 Hz, 8 H, CH), 1.52 (d, <sup>3</sup>J<sub>HH</sub> = 6.9 Hz, 24 H, CH<sub>3</sub>), 1.45 (d, <sup>3</sup>J<sub>HH</sub> = 6.8 Hz, 24 H, CH<sub>3</sub>). – <sup>13</sup>C{<sup>1</sup>H} NMR (100 MHz, C<sub>6</sub>D<sub>6</sub>): δ [ppm] = 160.1 (NCN), 149.3 (C≡C), 146.3 (*i*-Ph-C), 144.4 (*o*-Ph-C), 126.3 (*p*-Ph-CH), 123.7 (*m*-Ph-CH), 115.8 (C≡C), 113.2 (Cp-CH), 28.3 (CH), 24.8 (CH<sub>3</sub>), 24.5 (CH<sub>3</sub>). – IR (ATR):  $\tilde{\nu}$  [cm<sup>-1</sup>] = 2958 (m), 2926 (w), 2866 (w), 1485 (s), 1441 (m), 1364 (m), 1322 (m), 1254 (w), 1213 (w), 1179 (w), 1103 (vw), 1059 (vw), 1104 (m), 958 (vw), 937 (vw), 812 (vs), 780 (m), 749 (m), 734 (m), 696 (m), 601 (vw), 538 (vw), 459 (w), 419 (m). – Raman (solid state):  $\tilde{\nu}$  [cm<sup>-1</sup>] = 3119 (vw), 3060 (vw), 2963 (w), 2934 (w), 2867 (w), 2094 (vs), 1589 (w), 1445 (w), 1368 (m), 1267 (w), 1180 (vw), 1127 (m), 1003 (vw), 450 (w), 373 (w), 327 (w), 288 (w), 213 (w), 150 (w). – **Elemental Analysis**: calcd. (%) for [C<sub>74</sub>H<sub>88</sub>Au<sub>2</sub>Cl<sub>2</sub>N<sub>4</sub>Zr<sub>2</sub>+0.5 toluene] (1726.90): C 53.90, H 5.37, N 3.24; found: C 54.26, H 5.07, N 3.60.

# Supplementary Information

## III. NMR Measurements

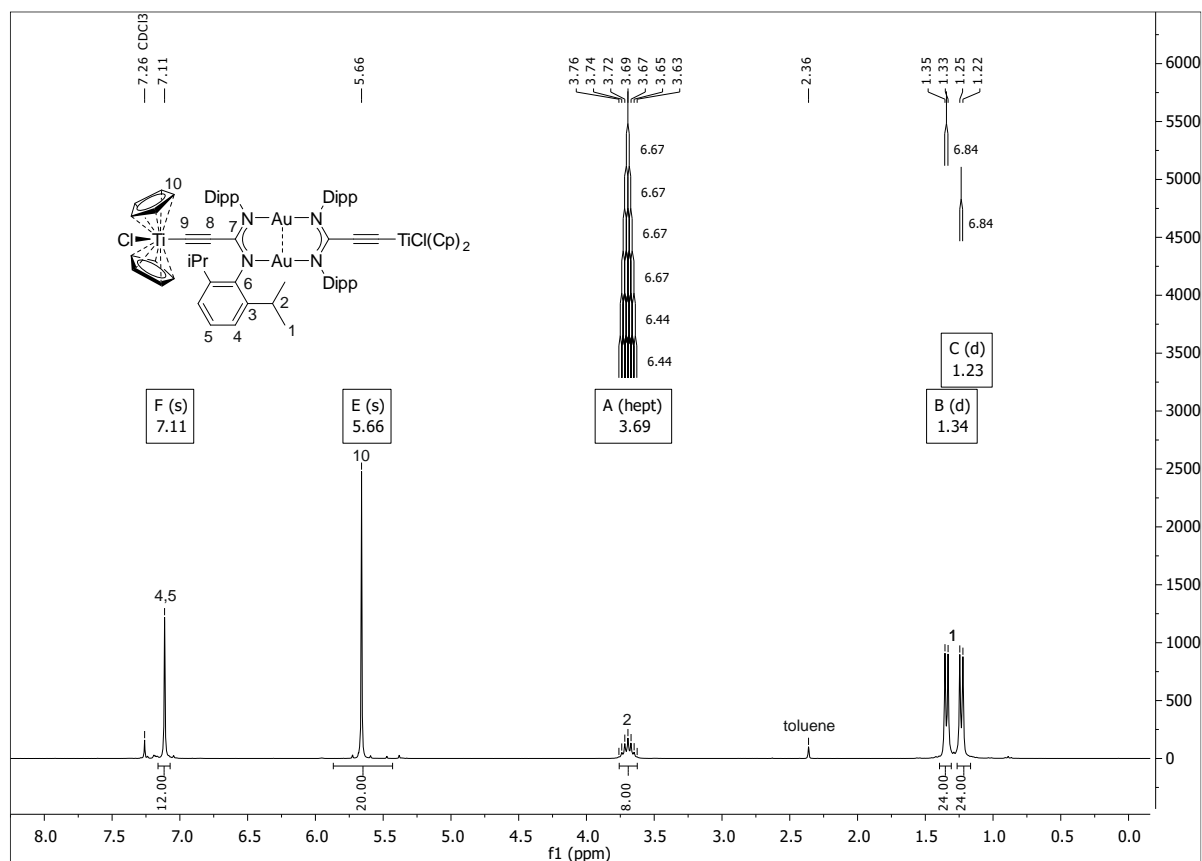

**Figure S1**  $^1\text{H}$  (300 MHz) NMR spectrum of compound **1** in  $\text{CDCl}_3$  at 25 °C.

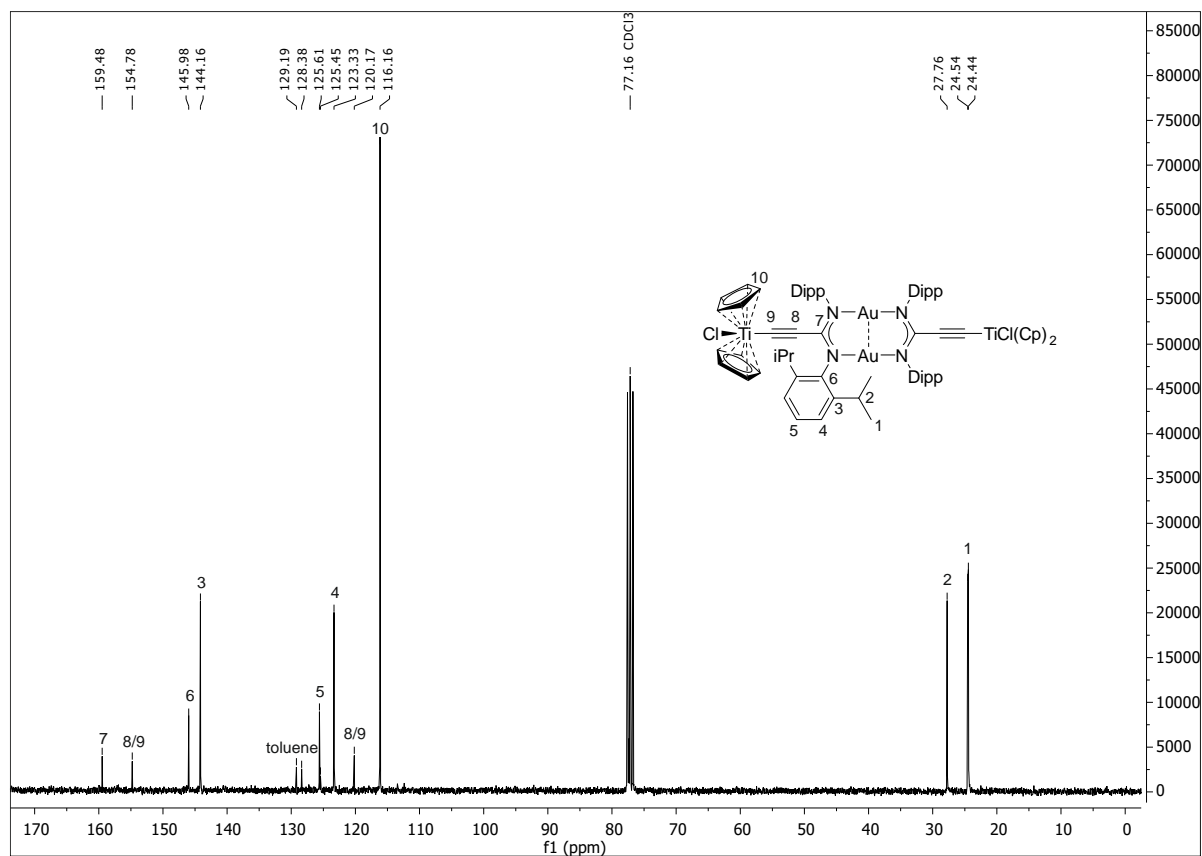

# Supplementary Information

**Figure S2**  $^{13}\text{C}\{^1\text{H}\}$  (75 MHz) NMR spectrum of compound **1** in  $\text{CDCl}_3$  at 25 °C.

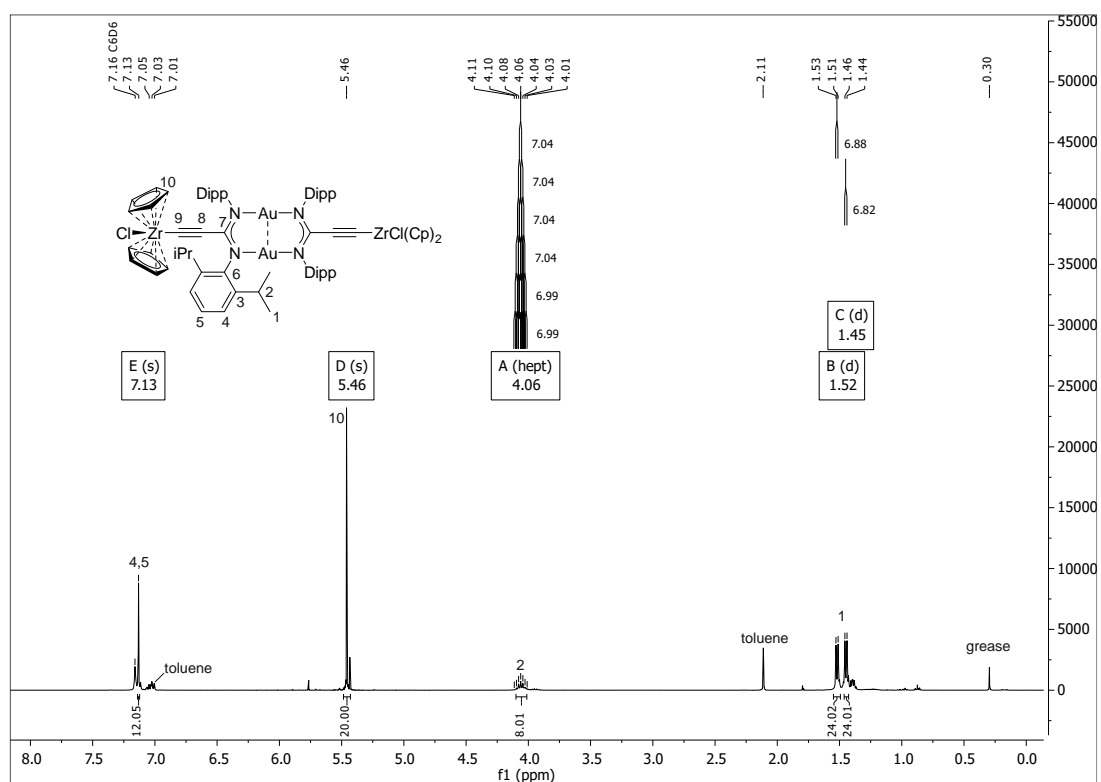

**Figure S3**  $^1\text{H}$  (400 MHz) NMR spectrum of compound **2** in  $\text{C}_6\text{D}_6$  at 25 °C.

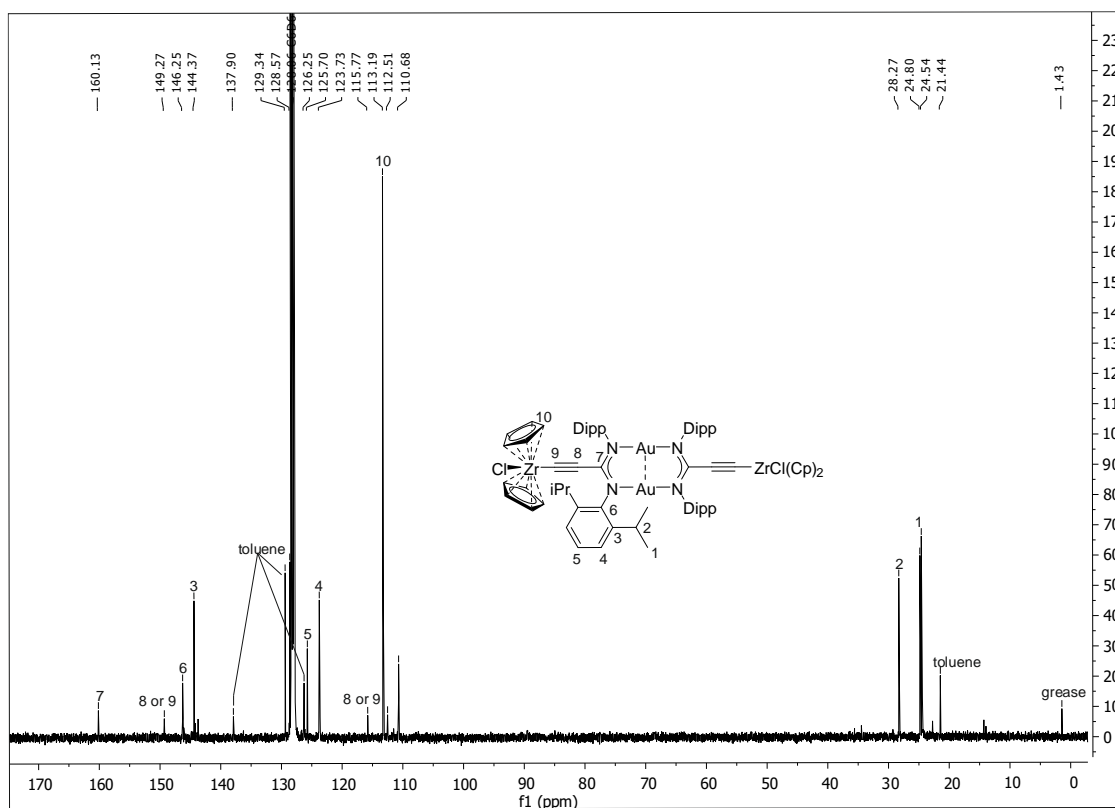

**Figure S4**  $^{13}\text{C}\{^1\text{H}\}$  (101 MHz) NMR spectrum of compound **2** in  $\text{C}_6\text{D}_6$  at 25 °C.



# Supplementary Information

## III. IR Measurements

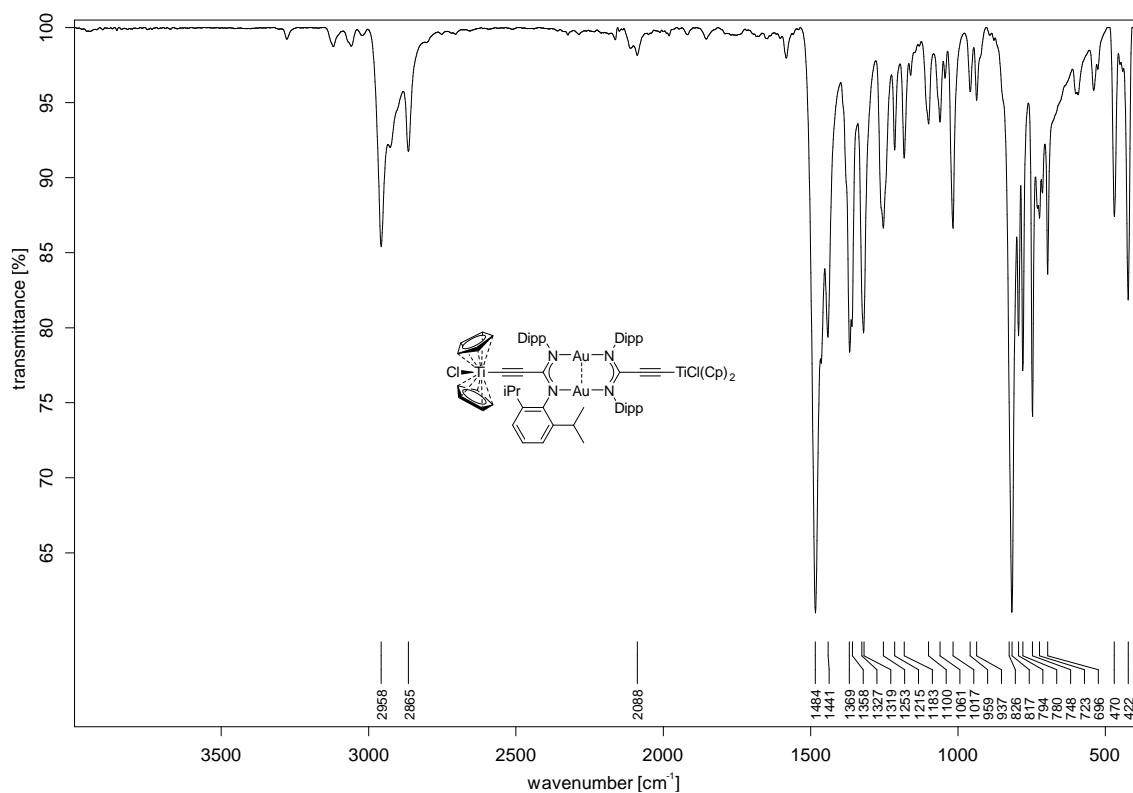

Figure S5: IR (ATR) spectrum of compound 1.

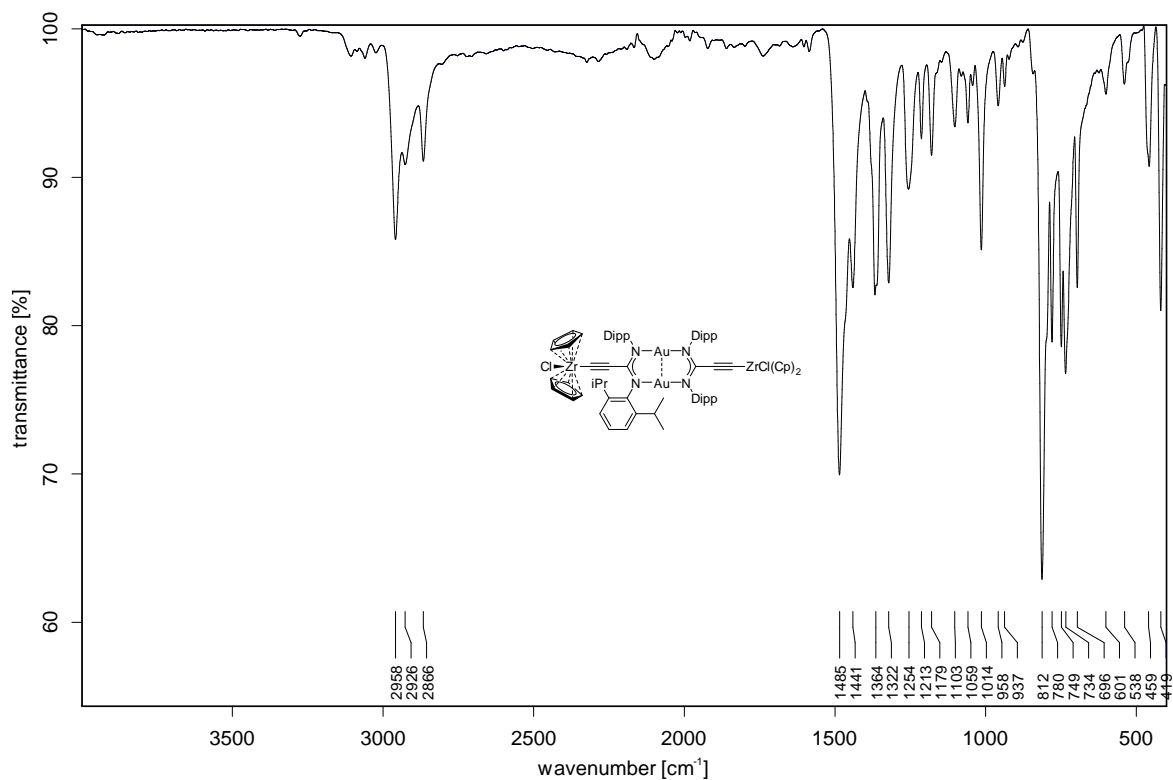

Figure S6: IR (ATR) spectrum of compound 2.

# Supplementary Information

## IV. Raman measurements

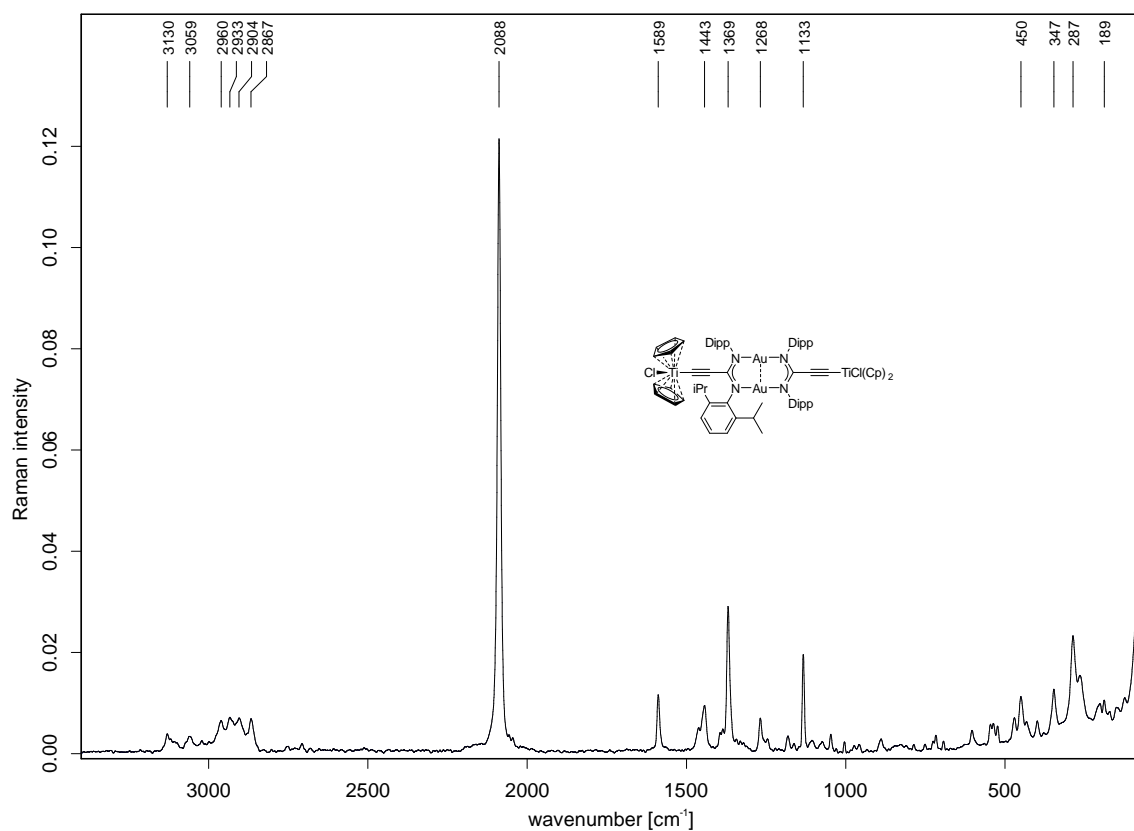

Figure S7 Raman (solid state) spectrum of compound 8.

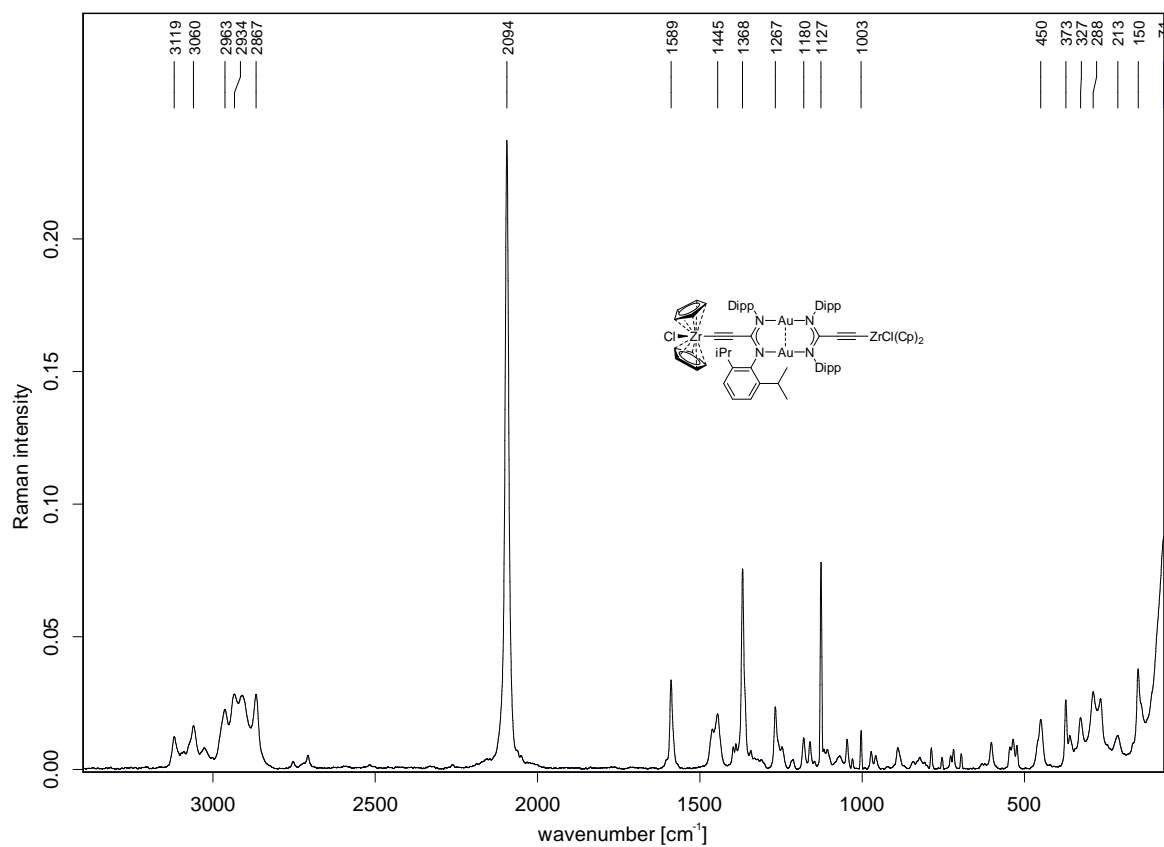

Figure S8 Raman (solid state) spectrum of compound 9.

## Supplementary Information

### VI. Single crystal X-ray diffraction data

**Table S1:** Crystal data and structure refinement for compounds **1** and **2**.

| Compound                                 | <b>1</b> ·(toluene) <sub>3</sub>                                                                | <b>2</b> ·(toluene) <sub>0.5</sub> ·(pentane) <sub>0.25</sub>                                     |
|------------------------------------------|-------------------------------------------------------------------------------------------------|---------------------------------------------------------------------------------------------------|
| Formula                                  | C <sub>95</sub> H <sub>112</sub> Au <sub>2</sub> Cl <sub>2</sub> N <sub>4</sub> Ti <sub>2</sub> | C <sub>83.5</sub> H <sub>102</sub> Au <sub>2</sub> Cl <sub>2</sub> N <sub>4</sub> Zr <sub>2</sub> |
| D <sub>calc.</sub> [g·cm <sup>-3</sup> ] | 1.407                                                                                           | 1.487                                                                                             |
| μ [mm <sup>-1</sup> ]                    | 3.593                                                                                           | 3.981                                                                                             |
| Formula Weight                           | 1870.51                                                                                         | 1808.96                                                                                           |
| Colour                                   | red                                                                                             | yellow                                                                                            |
| Shape                                    | prism-shaped                                                                                    | prism-shaped                                                                                      |
| Size [mm <sup>3</sup> ]                  | 0.27×0.17×0.10                                                                                  | 0.29×0.16×0.07                                                                                    |
| T [K]                                    | 100                                                                                             | 150                                                                                               |
| Crystal System                           | triclinic                                                                                       | triclinic                                                                                         |
| Space Group                              | <i>P</i> $\bar{1}$                                                                              | <i>P</i> $\bar{1}$                                                                                |
| a [Å]                                    | 15.9924(7)                                                                                      | 10.2511(4)                                                                                        |
| b [Å]                                    | 16.5310(7)                                                                                      | 14.1743(6)                                                                                        |
| c [Å]                                    | 18.2303(8)                                                                                      | 14.8080(5)                                                                                        |
| α [°]                                    | 81.979(3)                                                                                       | 85.570(3)                                                                                         |
| β [°]                                    | 73.636(4)                                                                                       | 73.580(3)                                                                                         |
| γ [°]                                    | 73.059(3)                                                                                       | 78.177(3)                                                                                         |
| V [Å <sup>3</sup> ]                      | 4415.0(4)                                                                                       | 2019.67(14)                                                                                       |
| Z                                        | 2                                                                                               | 1                                                                                                 |
| Z'                                       | 1                                                                                               | 0.5                                                                                               |
| Wavelength [Å]                           | 0.71073                                                                                         | 0.71073                                                                                           |
| Radiation type                           | MoK <sub>α</sub>                                                                                | MoK <sub>α</sub>                                                                                  |
| Θ <sub>min</sub> [°]                     | 1.618                                                                                           | 2.031                                                                                             |
| Θ <sub>max</sub> [°]                     | 29.659                                                                                          | 29.188                                                                                            |
| Measured Refl.                           | 42976                                                                                           | 19024                                                                                             |
| Independent Refl.                        | 21107                                                                                           | 10563                                                                                             |
| Reflections Used                         | 12501                                                                                           | 7514                                                                                              |
| R <sub>int</sub>                         | 0.0438                                                                                          | 0.0466                                                                                            |
| Parameters                               | 986                                                                                             | 361                                                                                               |
| Restraints                               | 263                                                                                             | 42                                                                                                |
| Largest Peak                             | 2.227                                                                                           | 1.007                                                                                             |
| Deepest Hole                             | -1.421                                                                                          | -0.994                                                                                            |
| Goof                                     | 0.942                                                                                           | 0.975                                                                                             |
| wR <sub>2</sub> (all data)               | 0.1479                                                                                          | 0.1087                                                                                            |
| wR <sub>2</sub>                          | 0.1310                                                                                          | 0.0982                                                                                            |
| R <sub>1</sub> (all data)                | 0.1046                                                                                          | 0.0784                                                                                            |
| R <sub>1</sub>                           | 0.0556                                                                                          | 0.0457                                                                                            |

## Supplementary Information

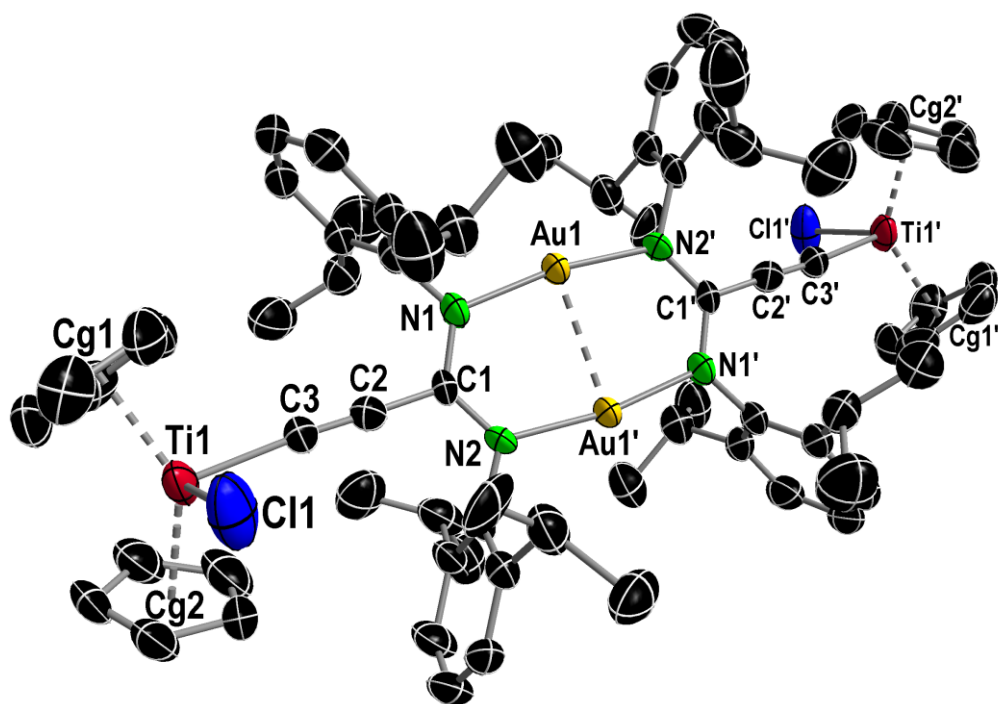

**Figure S9** Molecular structure of  $[\{\text{ClCp}_2\text{TiC}\equiv\text{CC}(\text{NDipp})_2\}\text{Ag}]_2$  (**8**) in the solid state with ellipsoids drawn at 50 % probability. Hydrogen atoms and solvent molecules are omitted for clarity. Selected bond lengths [Å] and angles [°]:

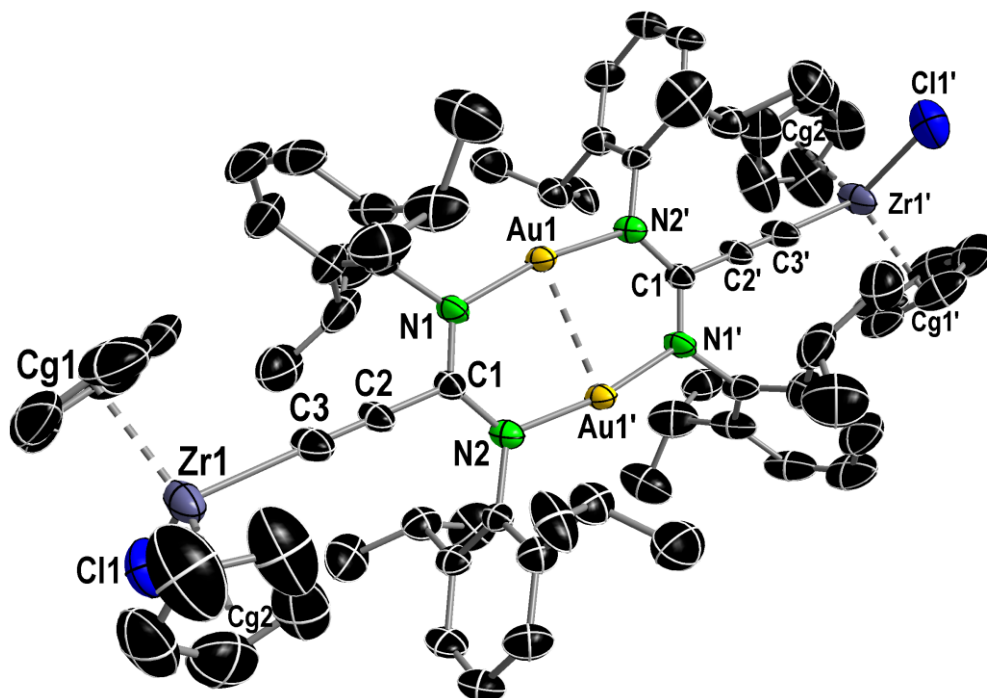

**Figure S10** Molecular structure of  $[\{\text{ClCp}_2\text{ZrC}\equiv\text{CC}(\text{NDipp})_2\}\text{Au}]_2$  (**2**) in the solid state with ellipsoids drawn at 50 % probability. Hydrogen atoms and solvent molecules are omitted for clarity. Selected bond lengths [Å] and angles [°]:

## VII. Photoluminescence data

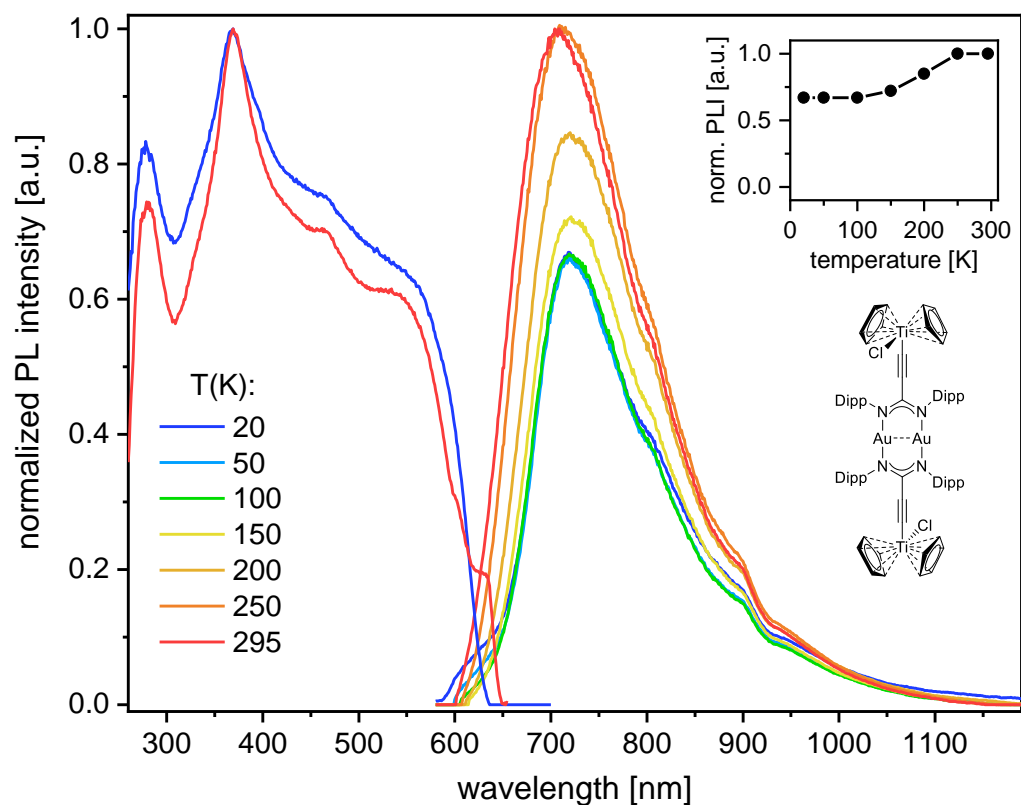

**Figure S11** Photoluminescence emission (PL) and excitation (PLE) spectra of polycrystalline compound **1** in the temperature range from 20 to 295 K. The inset depicts the integrated PL intensities versus temperature.

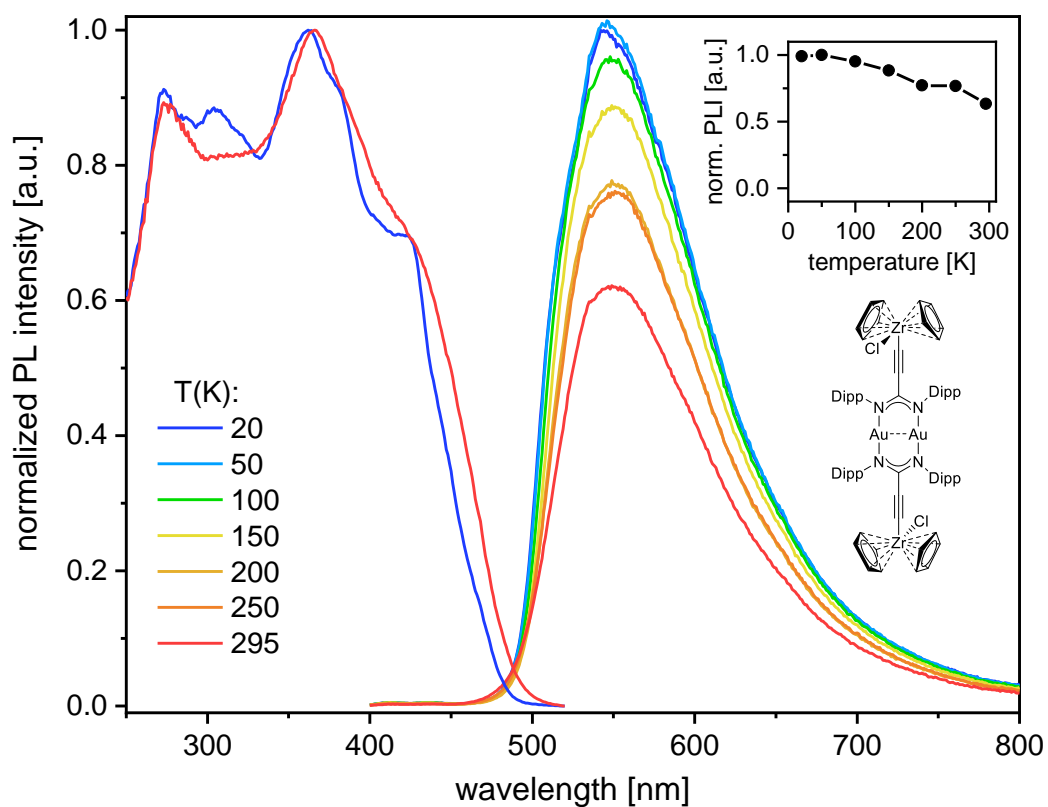

**Figure S12** Photoluminescence emission (PL) and excitation (PLE) spectra of polycrystalline compound **2** in the temperature range from 20 to 295 K. The inset depicts the integrated PL intensities versus temperature.

## Supplementary Information

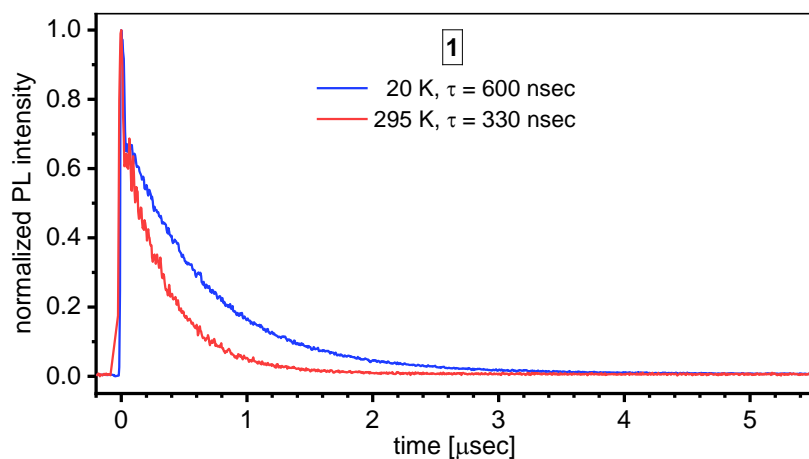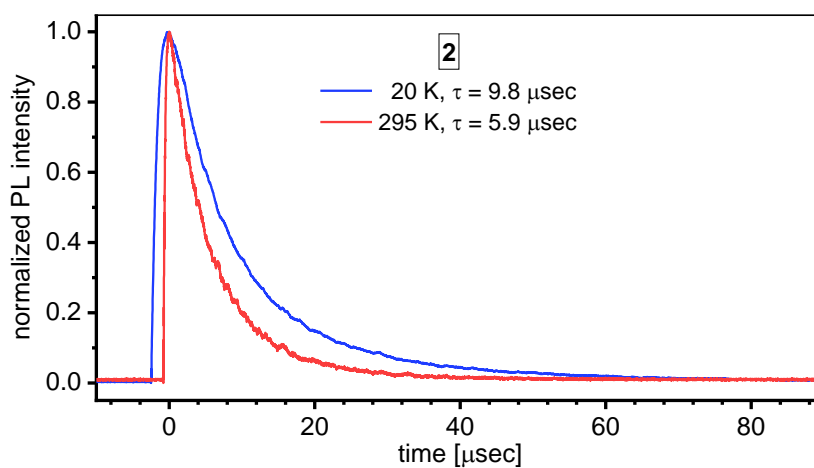

**Figure S13** PL decay curves at 20 and 295 K for compound **1** (top) and **2** (bottom).

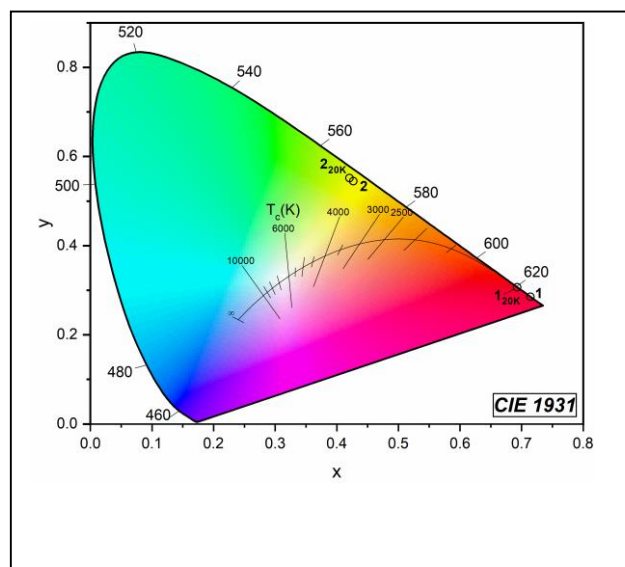

**Figure S14** CIE 1931 diagram for compounds **1** and **2** at 295 K and 20 K.

## Supplementary Information

**Table S2:** Photoluminescence data for compounds **1** and **2**.

| Compound                                           |                   | <b>1</b>                        | <b>2</b>                        |
|----------------------------------------------------|-------------------|---------------------------------|---------------------------------|
| Metal atoms                                        |                   | Au <sub>2</sub> Ti <sub>2</sub> | Au <sub>2</sub> Zr <sub>2</sub> |
| $\lambda_{\text{PLE}}^{\text{a}}$                  | [nm]              | 350                             | 360                             |
| $\lambda_{\text{PL}}(20/295 \text{ K})^{\text{b}}$ | [nm]              | 750 / 710                       | 545 / 550                       |
| $\lambda_{\text{PL,Max}}(20 \text{ K})^{\text{c}}$ | [nm]              | 720                             | 545                             |
| $\lambda_{\text{PL,Max}}(295 \text{ K})$           | [nm]              | 706                             | 550                             |
| FWHM(20 K) <sup>d</sup>                            | [nm]              | 147                             | 110                             |
| FWHM(295 K)                                        | [nm]              | 163                             | 108                             |
| $\lambda_{\text{PLE}}(\Phi)^{\text{e}}$            | [nm]              | 450                             | 350                             |
| $\tau(20 \text{ K})^{\text{f}}$                    | [ $\mu\text{s}$ ] | 0.60                            | 9.8                             |
| $\tau(295 \text{ K})$                              | [ $\mu\text{s}$ ] | 0.33                            | 5.9                             |
| $\Phi(\text{RT})^{\text{g}}$                       | [%]               | 0.6                             | 41                              |

[a] excitation wavelength for the measurement of the PL spectra. [b] emission wavelength for the measurement of the PLE spectra at 20 and 295 K, respectively. [c] emission maxima. [d] full width at half maximum of the emission bands. [e] excitation wavelength for the quantum yield determination. [f] PL lifetimes determined via monoexponential fits of the measured PL decay curves. [g] PL quantum yield at ambient temperature.

**Table S3:** DFT/ $\Delta$ -SCF calculated and experimentally observed phosphorescence energies of tetranuclear Ti<sub>2</sub>Au<sub>2</sub> (**1**) and Zr<sub>2</sub>Au<sub>2</sub> (**2**) described in this work and related Au<sub>2</sub>Au<sub>2</sub> complex [{Ph<sub>3</sub>PAu<sub>2</sub>MC≡CC(NDipp)<sub>2</sub>]<sub>2</sub>Au<sub>2</sub>] (M = Ti, Zr and Au, respectively).<sup>2</sup>

| M                                                          | Au                     | Ti          | Zr           |
|------------------------------------------------------------|------------------------|-------------|--------------|
| $E_{\text{tot}}$ (Singlet Ground state)/ a.u.              | -4931.50342            | -5981.17795 | -4376.495053 |
| $E_{\text{tot}}$ (Triplet state)/ a.u.                     | -4931.41370            | -5981.12322 | -4376.424045 |
| $E_{\text{tot}}$ (Singlet of Triplet state geometry)/ a.u. | -4931.49712            | -5981.17344 | -4376.489406 |
| calc.:                                                     |                        |             |              |
| $\Delta E/ \text{eV}$                                      | 2.27                   | 1.37        | 1.78         |
| $\lambda/ \text{nm}$                                       | 546.2                  | 907.3       | 697.1        |
| exp.:                                                      |                        |             |              |
| $\Delta E/ \text{eV}$                                      | 2.58/2.61 <sup>a</sup> | 1.72/1.76   | 2.27/2.25    |
| $\lambda/ \text{nm}$ (20/ 295 K)                           | 480/475 <sup>a</sup>   | 720/706     | 545/550      |

<sup>a</sup>) approx. center energy/ wavelength of vibronically structured phosphorescence band (Ref. 1).

VIII. UV-Vis Spectra

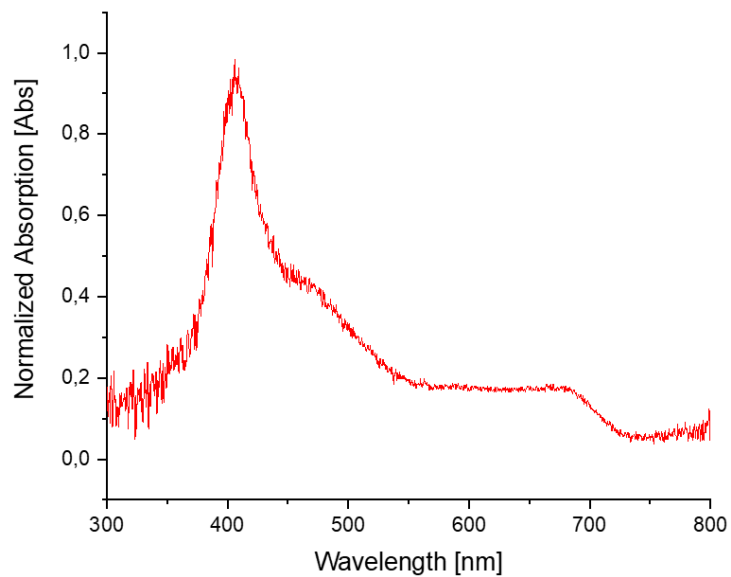

Figure S15 UV-Vis spectrum of compound 1 in THF.

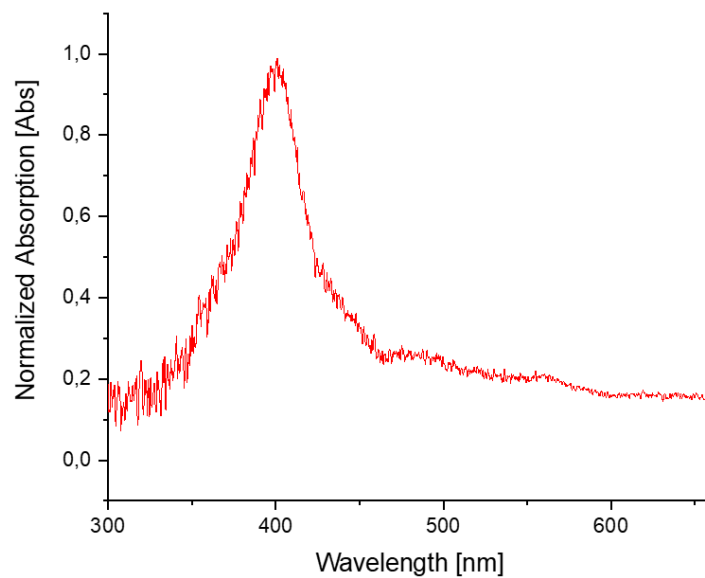

Figure S16 UV-Vis spectrum of compound 2 in THF.



## Supplementary Information

### IX. Quantum Chemical Calculations

Cartesian Coordinates of the molecules under discussion

[{ClCp<sub>2</sub>TiC≡CC(NDipp)<sub>2</sub>Au<sub>2</sub>] **1** (singlet ground state)

|                    |                    |                   |    |
|--------------------|--------------------|-------------------|----|
| -13.97850585125257 | 0.01627973507683   | -0.59837875916837 | ti |
| -16.70533571207911 | -3.47595175841357  | -1.50453958678117 | c  |
| -16.74857956804646 | -3.07403345574539  | 1.15440167892205  | c  |
| -14.26731103622407 | -3.55408599325974  | 2.10832396844140  | c  |
| -12.71238292853305 | -4.33163666386119  | 0.04468760817417  | c  |
| -14.20877734924857 | -4.25665911214226  | -2.18341093011939 | c  |
| -18.28324079608695 | -3.16666384369322  | -2.81729022442314 | h  |
| -18.39110595649781 | -2.47804398634047  | 2.27181178034304  | h  |
| -13.65521659111364 | -3.40250635772681  | 4.08486672995993  | h  |
| -10.71730871074826 | -4.87226227670772  | 0.15309396028724  | h  |
| -13.52457155042958 | -4.64434449146128  | -4.09875847152903 | h  |
| -0.01931803349302  | -2.62769246220761  | 0.10449692178107  | au |
| -3.89266478105045  | -2.20507278090497  | 0.07244772201542  | n  |
| -5.06930367472616  | 0.05523438271251   | -0.06099817968702 | c  |
| -7.76370885351829  | 0.03431441700872   | -0.21820239752443 | c  |
| -10.09873150875273 | -0.02532031869447  | -0.39221735703773 | c  |
| -7.24397256456846  | -8.11944770928022  | 1.96356049862529  | c  |
| -5.99393605911826  | -5.77769738140248  | 2.16843172761826  | c  |
| -5.34559469181245  | -4.47957872104255  | -0.08842223662750 | c  |
| -5.97046098395383  | -5.46657461558545  | -2.50447893671529 | c  |
| -7.24623874609307  | -7.80153547355401  | -2.61702139120940 | c  |
| -7.86236172689660  | -9.13506965280528  | -0.40790626442029 | c  |
| -7.76567085984225  | -9.15387004900770  | 3.69491497140420  | h  |
| -7.76331400333179  | -8.59920709270796  | -4.47279492429966 | h  |
| -8.85679403653210  | -10.96117512624353 | -0.53621824374064 | h  |
| -5.44242842746602  | -4.59588776235198  | 4.73766784173705  | c  |
| -7.90963158981266  | -3.59908482034642  | 5.93867566746996  | c  |
| -9.22498753132555  | -5.18222056126814  | 6.38220150782410  | h  |
| -7.50047279570603  | -2.56908330285135  | 7.72776805027761  | h  |
| -8.89979524813029  | -2.28554127007056  | 4.63053969842395  | h  |
| -4.00919365576964  | -6.39030801410716  | 6.52512898805495  | c  |
| -4.20297513499193  | -2.93600675579278  | 4.39194977268528  | h  |
| -3.50074426496387  | -5.39871504340521  | 8.30859575982379  | h  |
| -2.22978289683589  | -7.06910010639792  | 5.63679566229460  | h  |
| -5.16271639705211  | -8.07393855892236  | 7.04172650502787  | h  |
| -5.24108929737679  | -4.05624952846303  | -4.90793390125272 | c  |
| -3.20405952831726  | -5.51723952925488  | -6.39449102398901 | c  |
| -7.57543394315630  | -3.40991946305704  | -6.52191237301613 | c  |
| -3.92220003091375  | -7.36350544888784  | -7.10169847709536 | h  |
| -8.54899902678461  | -5.15117757492317  | -7.19681479320456 | h  |
| -2.54099832077065  | -4.39937926961165  | -8.04965703583331 | h  |
| -7.02205272124577  | -2.30458003713842  | -8.22367109170747 | h  |
| -1.53901260285851  | -5.89881178867479  | -5.16896427970765 | h  |
| -8.95919037956241  | -2.26257471233557  | -5.42977312708346 | h  |
| -4.35910506065933  | -2.24371890517267  | -4.32932014917719 | h  |
| 13.97850585125257  | -0.01627973507683  | 0.59837875916837  | ti |
| 15.73498739238163  | -4.22914904180321  | 0.54441491605438  | c  |
| -17.02291617091603 | 2.70300758732310   | 1.26581712505998  | c  |
| 16.74857956804646  | 3.07403345574539   | -1.15440167892205 | c  |
| -15.73498739238163 | 4.22914904180321   | -0.54441491605438 | c  |
| 16.70533571207911  | 3.47595175841357   | 1.50453958678117  | c  |

## Supplementary Information

|                    |                    |                   |    |
|--------------------|--------------------|-------------------|----|
| 17.02291617091603  | -2.70300758732310  | -1.26581712505998 | c  |
| 15.24743189273238  | -2.06701301394771  | -3.21258469635106 | c  |
| -13.16891664122984 | 4.44426514236201   | 0.20554364109815  | c  |
| 14.20877734924857  | 4.25665911214226   | 2.18341093011939  | c  |
| -15.24743189273238 | 2.06701301394771   | 3.21258469635106  | c  |
| 14.267311103622407 | 3.55408599325974   | -2.10832396844140 | c  |
| 13.16891664122984  | -4.44426514236201  | -0.20554364109815 | c  |
| 12.87628973960333  | -3.12260930076539  | -2.54884183434621 | c  |
| -12.87628973960333 | 3.12260930076539   | 2.54884183434621  | c  |
| 12.71238292853305  | 4.33163666386119   | -0.04468760817417 | c  |
| 16.54978276043484  | -4.98614263787841  | 2.29214808318108  | h  |
| -19.03126967739895 | 2.18380133820694   | 1.21452127012776  | h  |
| 18.39110595649781  | 2.47804398634047   | -2.27181178034304 | h  |
| -16.54978276043484 | 4.98614263787841   | -2.29214808318108 | h  |
| 18.28324079608695  | 3.16666384369322   | 2.81729022442314  | h  |
| 19.03126967739895  | -2.18380133820694  | -1.21452127012776 | h  |
| 15.64102530312888  | -0.94399983715461  | -4.91193826231995 | h  |
| -11.64006654454949 | 5.37469046143544   | -0.84459050283415 | h  |
| 13.52457155042958  | 4.64434449146128   | 4.09875847152903  | h  |
| -15.64102530312888 | 0.94399983715461   | 4.91193826231995  | h  |
| 13.65521659111364  | 3.40250635772681   | -4.08486672995993 | h  |
| 11.64006654454949  | -5.37469046143544  | 0.84459050283415  | h  |
| 11.11529809533681  | -2.94926975793972  | -3.61986286560408 | h  |
| -11.11529809533681 | 2.94926975793972   | 3.61986286560408  | h  |
| 10.71730871074826  | 4.87226227670772   | -0.15309396028724 | h  |
| 0.01931803349302   | 2.62769246220761   | -0.10449692178107 | au |
| 3.87999289293300   | -2.31364663763574  | 0.07300687113836  | n  |
| -3.87999289293300  | 2.31364663763574   | -0.07300687113836 | n  |
| 3.89266478105045   | 2.20507278090497   | -0.07244772201542 | n  |
| 5.06930367472616   | -0.05523438271251  | 0.06099817968702  | c  |
| 7.76370885351829   | -0.03431441700872  | 0.21820239752443  | c  |
| 10.09873150875273  | 0.02532031869447   | 0.39221735703773  | c  |
| 7.06006393374211   | -8.35504470258976  | -1.67580782916367 | c  |
| -7.64764611755567  | 7.61957391012921   | -2.81927114202983 | c  |
| 7.24623874609307   | 7.80153547355401   | 2.61702139120940  | c  |
| -7.06006393374211  | 8.35504470258976   | 1.67580782916367  | c  |
| 7.24397256456846   | 8.11944770928022   | -1.96356049862529 | c  |
| 7.64764611755567   | -7.61957391012921  | 2.81927114202983  | c  |
| 5.67920441528265   | -6.09162505371701  | -1.91528440595137 | c  |
| -6.29081961040273  | 5.33421485505331   | -2.67920946321590 | c  |
| 5.97046098395383   | 5.46657461558545   | 2.50447893671529  | c  |
| -5.67920441528265  | 6.09162505371701   | 1.91528440595137  | c  |
| 5.99393605911826   | 5.77769738140248   | -2.16843172761826 | c  |
| 6.29081961040273   | -5.33421485505331  | 2.67920946321590  | c  |
| 5.34325283742626   | -4.57865084585436  | 0.27881849971109  | c  |
| -5.34325283742626  | 4.57865084585436   | -0.27881849971109 | c  |
| 5.34559469181245   | 4.47957872104255   | 0.08842223662750  | c  |
| 8.04692881630570   | -9.11248407058276  | 0.66459696589663  | c  |
| -8.04692881630570  | 9.11248407058276   | -0.66459696589663 | c  |
| 7.86236172689660   | 9.13506965280528   | 0.40790626442029  | c  |
| 7.36536024654314   | -9.55779340384312  | -3.34647508100439 | h  |
| -8.41475684116472  | 8.24265580844133   | -4.65091603605995 | h  |
| 7.76331400333179   | 8.59920709270796   | 4.47279492429966  | h  |
| -7.36536024654314  | 9.55779340384312   | 3.34647508100439  | h  |
| 7.76567085984225   | 9.15387004900770   | -3.69491497140420 | h  |
| 8.41475684116472   | -8.24265580844133  | 4.65091603605995  | h  |
| 9.13414808001315   | -10.88464661302431 | 0.81124289499757  | h  |
| -9.13414808001315  | 10.88464661302431  | -0.81124289499757 | h  |
| 8.85679403653210   | 10.96117512624353  | 0.53621824374064  | h  |

## Supplementary Information

|                   |                   |                   |   |
|-------------------|-------------------|-------------------|---|
| 4.55211786838246  | -5.24971723791902 | -4.43581732167585 | c |
| -5.74048894902024 | 3.77580876648465  | -5.04292875535723 | c |
| 5.24108929737679  | 4.05624952846303  | 4.90793390125272  | c |
| -4.55211786838246 | 5.24971723791902  | 4.43581732167585  | c |
| 5.44242842746602  | 4.59588776235198  | -4.73766784173705 | c |
| 5.74048894902024  | -3.77580876648465 | 5.04292875535723  | c |
| 6.27644290374070  | -3.31438470249790 | -5.76538742455885 | c |
| -7.88269187150653 | 3.82997101250979  | -7.00048567191777 | c |
| 7.57543394315630  | 3.40991946305704  | 6.52191237301613  | c |
| -6.27644290374070 | 3.31438470249790  | 5.76538742455885  | c |
| 7.90963158981266  | 3.59908482034642  | -5.93867566746996 | c |
| 7.88269187150653  | -3.82997101250979 | 7.00048567191777  | c |
| 8.07360114348081  | -4.22675248128382 | -6.37418109999551 | h |
| -8.06187716388843 | 5.71443085160418  | -7.91779764737806 | h |
| 8.54899902678461  | 5.15117757492317  | 7.19681479320456  | h |
| -8.07360114348081 | 4.22675248128382  | 6.37418109999551  | h |
| 9.22498753132555  | 5.18222056126814  | -6.38220150782410 | h |
| 8.06187716388843  | -5.71443085160418 | 7.91779764737806  | h |
| 5.34165360814067  | -2.52727733560311 | -7.47942914386907 | h |
| -7.48635319288220 | 2.44127487166033  | -8.52677635792585 | h |
| 7.02205272124577  | 2.30458003713842  | 8.22367109170747  | h |
| -5.34165360814067 | 2.52727733560311  | 7.47942914386907  | h |
| 7.50047279570603  | 2.56908330285135  | -7.72776805027761 | h |
| 7.48635319288220  | -2.44127487166033 | 8.52677635792585  | h |
| 6.76207876807861  | -1.71381752194565 | -4.50073882685032 | h |
| -9.72946222504516 | 3.31950473732033  | -6.13556106905414 | h |
| 8.95919037956241  | 2.26257471233557  | 5.42977312708346  | h |
| -6.76207876807861 | 1.71381752194565  | 4.50073882685032  | h |
| 8.89979524813029  | 2.28554127007056  | -4.63053969842395 | h |
| 9.72946222504516  | -3.31950473732033 | 6.13556106905414  | h |
| 3.88919188114586  | -7.44563273433013 | -6.22207638535941 | c |
| -3.19273180316554 | 4.59987931489233  | -6.20966389179882 | c |
| 3.20405952831726  | 5.51723952925488  | 6.39449102398901  | c |
| -3.88919188114586 | 7.44563273433013  | 6.22207638535941  | c |
| 4.00919365576964  | 6.39030801410716  | -6.52512898805495 | c |
| 3.19273180316554  | -4.59987931489233 | 6.20966389179882  | c |
| 2.75274896300057  | -4.25256108193018 | -3.98917465021158 | h |
| -5.51915463527177 | 1.77838621689279  | -4.44785545873222 | h |
| 4.35910506065933  | 2.24371890517267  | 4.32932014917719  | h |
| -2.75274896300057 | 4.25256108193018  | 3.98917465021158  | h |
| 4.20297513499193  | 2.93600675579278  | -4.39194977268528 | h |
| 5.51915463527177  | -1.77838621689279 | 4.44785545873222  | h |
| 2.78838276451984  | -6.73224527761459 | -7.86322070360887 | h |
| -2.72604997690092 | 3.41873821605022  | -7.88644034788572 | h |
| 2.54099832077065  | 4.39937926961165  | 8.04965703583331  | h |
| -2.78838276451984 | 6.73224527761459  | 7.86322070360887  | h |
| 3.50074426496387  | 5.39871504340521  | -8.30859575982379 | h |
| 2.72604997690092  | -3.41873821605022 | 7.88644034788572  | h |
| 2.73024734347516  | -8.90132261791960 | -5.24437834515363 | h |
| -1.62269080252341 | 4.38967173285052  | -4.82373602398954 | h |
| 1.53901260285851  | 5.89881178867479  | 5.16896427970765  | h |
| -2.73024734347516 | 8.90132261791960  | 5.24437834515363  | h |
| 2.22978289683589  | 7.06910010639792  | -5.63679566229460 | h |
| 1.62269080252341  | -4.38967173285052 | 4.82373602398954  | h |
| 5.60786024745858  | -8.38254392527798 | -6.99371684709516 | h |
| -3.25260507842533 | 6.61391463404196  | -6.82030257362511 | h |
| 3.92220003091375  | 7.36350544888784  | 7.10169847709536  | h |
| -5.60786024745858 | 8.38254392527798  | 6.99371684709516  | h |
| 5.16271639705211  | 8.07393855892236  | -7.04172650502787 | h |

## Supplementary Information

|                    |                   |                   |    |
|--------------------|-------------------|-------------------|----|
| 3.25260507842533   | -6.61391463404196 | 6.82030257362511  | h  |
| 14.15113618597437  | -0.84776463449982 | 4.90130296952760  | cl |
| -14.15113618597437 | 0.84776463449982  | -4.90130296952760 | cl |

### [[ClCp<sub>2</sub>TiC≡CC(NDipp)<sub>2</sub>Au<sub>2</sub>] 1 (triplet state)

|                    |                    |                   |    |
|--------------------|--------------------|-------------------|----|
| -13.99530351264388 | -0.06095569740582  | -0.64536803858081 | ti |
| -16.66536488059442 | -3.66344969572200  | -1.10077624143252 | c  |
| -16.81302670621230 | -2.85898286852832  | 1.46712429370047  | c  |
| -14.37769973704578 | -3.18198062404818  | 2.58857014599946  | c  |
| -12.74794123292800 | -4.25952599880404  | 0.72792999629323  | c  |
| -14.14907367955649 | -4.54034587050991  | -1.54371410171611 | c  |
| -18.19014131401935 | -3.58118945031983  | -2.50560707934817 | h  |
| -18.49901410265262 | -2.10946604389975  | 2.41376769991411  | h  |
| -13.84017659277488 | -2.70514314451163  | 4.53492421482644  | h  |
| -10.75845453999309 | -4.76514144344394  | 0.99222489585800  | h  |
| -13.38723320526914 | -5.20729050552439  | -3.35051354977365 | h  |
| -0.02097223894766  | -2.58917538384502  | 0.05446861417947  | au |
| -3.86669542471121  | -2.21985388573253  | 0.21571083581360  | n  |
| -5.09537943771346  | 0.04240952172514   | 0.07549464243032  | c  |
| -7.75285646534395  | 0.04472466969360   | -0.11946434140992 | c  |
| -10.09823083826120 | -0.02165293222597  | -0.34419785004039 | c  |
| -7.14871978269709  | -8.19900946539357  | 1.98048304976666  | c  |
| -5.86168956735060  | -5.88465485019388  | 2.23476447492527  | c  |
| -5.32209861640186  | -4.49182275221268  | 0.00512097391187  | c  |
| -6.07345217765422  | -5.35101831520508  | -2.42770043529429 | c  |
| -7.35751582563408  | -7.67416380326983  | -2.57874683315018 | c  |
| -7.88517759186236  | -9.09625176019981  | -0.40323196002203 | c  |
| -7.62301019788301  | -9.30051153109880  | 3.68296671660456  | h  |
| -7.94721976934286  | -8.39400477300840  | -4.44170248098954 | h  |
| -8.90101017201781  | -10.90739045079477 | -0.56462263798383 | h  |
| -5.26508936473195  | -4.78515797763975  | 4.82763136180781  | c  |
| -7.70861597603231  | -3.69422721478108  | 5.99957184092069  | c  |
| -9.09555830504841  | -5.22893974889002  | 6.38840461550196  | h  |
| -7.29633083787534  | -2.70580724328464  | 7.81007404480842  | h  |
| -8.61902595581788  | -2.32862664452599  | 4.68806138489106  | h  |
| -3.95960183656471  | -6.68093911179509  | 6.60514734505671  | c  |
| -3.94194103028989  | -3.17990294327289  | 4.53465759353254  | h  |
| -3.38518729746540  | -5.73237102664844  | 8.39159961844077  | h  |
| -2.23429723121065  | -7.48656445571194  | 5.71727848547829  | h  |
| -5.22835077588340  | -8.27654499371326  | 7.12378722156705  | h  |
| -5.38024080104277  | -3.88328626564364  | -4.80635891300564 | c  |
| -3.10755772927470  | -5.14710474970132  | -6.12901521662124 | c  |
| -7.64034881159557  | -3.50015431981795  | -6.59374628048872 | c  |
| -3.59208492151218  | -7.08724266476860  | -6.78074251017886 | h  |
| -8.34043623379443  | -5.32026320313377  | -7.38351367489691 | h  |
| -2.49856719413891  | -4.02760264814478  | -7.80275438600242 | h  |
| -7.07312180844321  | -2.29582985255632  | -8.22069066583886 | h  |
| -1.46596942572889  | -5.30157035899294  | -4.82113573326358 | h  |
| -9.23752898706653  | -2.54651856655314  | -5.61668599254945 | h  |
| -4.74405471134238  | -1.97387406670576  | -4.21514404317184 | h  |
| 13.99530351264388  | 0.06095569740582   | 0.64536803858081  | ti |
| 15.93454439420685  | -3.97739210323994  | 1.48415868765594  | c  |
| -17.22221721860712 | 2.84807916409105   | 0.58840611683202  | c  |
| 16.81302670621230  | 2.85898286852832   | -1.46712429370047 | c  |
| -15.93454439420685 | 3.97739210323994   | -1.48415868765594 | c  |
| 16.66536488059442  | 3.66344969572200   | 1.10077624143252  | c  |
| 17.22221721860712  | -2.84807916409105  | -0.58840611683202 | c  |

## Supplementary Information

|                    |                    |                   |    |
|--------------------|--------------------|-------------------|----|
| 15.47749066429896  | -2.66769748616579  | -2.65527214763052 | c  |
| -13.39032353631635 | 4.43275825998628   | -0.73809171219515 | c  |
| 14.14907367955649  | 4.54034587050991   | 1.54371410171611  | c  |
| -15.47749066429896 | 2.66769748616579   | 2.65527214763052  | c  |
| 14.37769973704578  | 3.18198062404818   | -2.58857014599946 | c  |
| 13.39032353631635  | -4.43275825998628  | 0.73809171219515  | c  |
| 13.11716815280192  | -3.64619933306601  | -1.83625388217068 | c  |
| -13.11716815280192 | 3.64619933306601   | 1.83625388217068  | c  |
| 12.74794123292800  | 4.25952599880404   | -0.72792999629323 | c  |
| 16.72050985542547  | -4.30958950249597  | 3.37208155280267  | h  |
| -19.20923684033113 | 2.25170495190307   | 0.60612069903379  | h  |
| 18.49901410265262  | 2.10946604389975   | -2.41376769991411 | h  |
| -16.72050985542547 | 4.30958950249597   | -3.37208155280267 | h  |
| 18.19014131401935  | 3.58118945031983   | 2.50560707934817  | h  |
| 19.20923684033113  | -2.25170495190307  | -0.60612069903379 | h  |
| 15.89038818219218  | -1.88665790989176  | -4.53236119841058 | h  |
| -11.86492129812239 | 5.17956951396789   | -1.92553724947643 | h  |
| 13.38723320526914  | 5.20729050552439   | 3.35051354977365  | h  |
| -15.89038818219218 | 1.88665790989176   | 4.53236119841058  | h  |
| 13.84017659277488  | 2.70514314451163   | -4.53492421482644 | h  |
| 11.86492129812239  | -5.17956951396789  | 1.92553724947643  | h  |
| 11.37082203246217  | -3.75979962410985  | -2.94507599112887 | h  |
| -11.37082203246217 | 3.75979962410985   | 2.94507599112887  | h  |
| 10.75845453999309  | 4.76514144344394   | -0.99222489585800 | h  |
| 0.02097223894766   | 2.58917538384502   | -0.05446861417947 | au |
| 3.83556076057866   | -2.29152148986180  | -0.14805309898365 | n  |
| -3.83556076057866  | 2.29152148986180   | 0.14805309898365  | n  |
| 3.86669542471121   | 2.21985388573253   | -0.21571083581360 | n  |
| 5.09537943771346   | -0.04240952172514  | -0.07549464243032 | c  |
| 7.75285646534395   | -0.04472466969360  | 0.11946434140992  | c  |
| 10.09823083826120  | 0.02165293222597   | 0.34419785004039  | c  |
| 7.02066834909123   | -8.28656369971118  | -1.99757935706162 | c  |
| -7.53191177637399  | 7.66949544746982   | -2.52912091873721 | c  |
| 7.35751582563408   | 7.67416380326983   | 2.57874683315018  | c  |
| -7.02066834909123  | 8.28656369971118   | 1.99757935706162  | c  |
| 7.14871978269709   | 8.19900946539357   | -1.98048304976666 | c  |
| 7.53191177637399   | -7.66949544746982  | 2.52912091873721  | c  |
| 5.63744843782423   | -6.02517706085058  | -2.19963600557441 | c  |
| -6.20345193581091  | 5.36969501585243   | -2.42682942262593 | c  |
| 6.07345217765422   | 5.35101831520508   | 2.42770043529429  | c  |
| -5.63744843782423  | 6.02517706085058   | 2.19963600557441  | c  |
| 5.86168956735060   | 5.88465485019388   | -2.23476447492527 | c  |
| 6.20345193581091   | -5.36969501585243  | 2.42682942262593  | c  |
| 5.27757274090501   | -4.57019053594938  | 0.03134828090180  | c  |
| -5.27757274090501  | 4.57019053594938   | -0.03134828090180 | c  |
| 5.32209861640186   | 4.49182275221268   | -0.00512097391187 | c  |
| 7.96056738099568   | -9.10644933630409  | 0.34187814217088  | c  |
| -7.96056738099568  | 9.10644933630409   | -0.34187814217088 | c  |
| 7.88517759186236   | 9.09625176019981   | 0.40323196002203  | c  |
| 7.37328483879585   | -9.43265940700328  | -3.69872206069749 | h  |
| -8.25653819617341  | 8.35173239594273   | -4.35744108423187 | h  |
| 7.94721976934286   | 8.39400477300840   | 4.44170248098954  | h  |
| -7.37328483879585  | 9.43265940700328   | 3.69872206069749  | h  |
| 7.62301019788301   | 9.30051153109880   | -3.68296671660456 | h  |
| 8.25653819617341   | -8.35173239594273  | 4.35744108423187  | h  |
| 9.03492240013417   | -10.88697952976274 | 0.46308676157905  | h  |
| -9.03492240013417  | 10.88697952976274  | -0.46308676157905 | h  |
| 8.90101017201781   | 10.90739045079477  | 0.56462263798383  | h  |
| 4.68040129548146   | -5.05461078052645  | -4.73878518338236 | c  |

## Supplementary Information

|                   |                   |                   |   |
|-------------------|-------------------|-------------------|---|
| -5.62138412970199 | 3.87459130263793  | -4.81991272856135 | c |
| 5.38024080104277  | 3.88328626564364  | 4.80635891300564  | c |
| -4.68040129548146 | 5.05461078052645  | 4.73878518338236  | c |
| 5.26508936473195  | 4.78515797763975  | -4.82763136180781 | c |
| 5.62138412970199  | -3.87459130263793 | 4.81991272856135  | c |
| 6.71551423806347  | -3.39463036162852 | -6.00783806927879 | c |
| -7.84808611010761 | 3.76077990453040  | -6.68173184049486 | c |
| 7.64034881159557  | 3.50015431981795  | 6.59374628048872  | c |
| -6.71551423806347 | 3.39463036162852  | 6.00783806927879  | c |
| 7.70861597603231  | 3.69422721478108  | -5.99957184092069 | c |
| 7.84808611010761  | -3.76077990453040 | 6.68173184049486  | c |
| 8.40562681216758  | -4.54977747862206 | -6.49874154391457 | h |
| -8.28818372715470 | 5.64512066916667  | -7.50806969412633 | h |
| 8.34043623379443  | 5.32026320313377  | 7.38351367489691  | h |
| -8.40562681216758 | 4.54977747862206  | 6.49874154391457  | h |
| 9.09555830504841  | 5.22893974889002  | -6.38840461550196 | h |
| 8.28818372715470  | -5.64512066916667 | 7.50806969412633  | h |
| 5.98365397152681  | -2.52732316187355 | -7.77926366055783 | h |
| -7.37362774258880 | 2.48431581946634  | -8.28210941259451 | h |
| 7.07312180844321  | 2.29582985255632  | 8.22069066583886  | h |
| -5.98365397152681 | 2.52732316187355  | 7.77926366055783  | h |
| 7.29633083787534  | 2.70580724328464  | -7.81007404480842 | h |
| 7.37362774258880  | -2.48431581946634 | 8.28210941259451  | h |
| 7.34172066604382  | -1.85244016173382 | -4.72897363371576 | h |
| -9.58164807282233 | 3.00438070929193  | -5.76632588098134 | h |
| 9.23752898706653  | 2.54651856655314  | 5.61668599254945  | h |
| -7.34172066604382 | 1.85244016173382  | 4.72897363371576  | h |
| 8.61902595581788  | 2.32862664452599  | -4.68806138489106 | h |
| 9.58164807282233  | -3.00438070929193 | 5.76632588098134  | h |
| 3.75246617682033  | -7.15512518724146 | -6.52052490193365 | c |
| -3.19925828048065 | 4.91683720870459  | -6.07184310840603 | c |
| 3.10755772927470  | 5.14710474970132  | 6.12901521662124  | c |
| -3.75246617682033 | 7.15512518724146  | 6.52052490193365  | c |
| 3.95960183656471  | 6.68093911179509  | -6.60514734505671 | c |
| 3.19925828048065  | -4.91683720870459 | 6.07184310840603  | c |
| 3.03758871505360  | -3.80467461514547 | -4.34178221796740 | h |
| -5.20983816487960 | 1.89777115584508  | -4.25437230786461 | h |
| 4.74405471134238  | 1.97387406670576  | 4.21514404317184  | h |
| -3.03758871505360 | 3.80467461514547  | 4.34178221796740  | h |
| 3.94194103028989  | 3.17990294327289  | -4.53465759353254 | h |
| 5.20983816487960  | -1.89777115584508 | 4.25437230786461  | h |
| 2.80778957185671  | -6.31112855841501 | -8.19777280128819 | h |
| -2.68647555401528 | 3.78032861252450  | -7.76606576475485 | h |
| 2.49856719413891  | 4.02760264814478  | 7.80275438600242  | h |
| -2.80778957185671 | 6.31112855841501  | 8.19777280128819  | h |
| 3.38518729746540  | 5.73237102664844  | -8.39159961844077 | h |
| 2.68647555401528  | -3.78032861252450 | 7.76606576475485  | h |
| 2.36744352368609  | -8.41169000016802 | -5.56278431063722 | h |
| -1.56736169163070 | 4.85921392696670  | -4.74188507856749 | h |
| 1.46596942572889  | 5.30157035899294  | 4.82113573326358  | h |
| -2.36744352368609 | 8.41169000016802  | 5.56278431063722  | h |
| 2.23429723121065  | 7.48656445571194  | -5.71727848547829 | h |
| 1.56736169163070  | -4.85921392696670 | 4.74188507856749  | h |
| 5.33270257563920  | -8.34729035217757 | -7.23174243047933 | h |
| -3.46375610490605 | 6.91405674022596  | -6.67546305673728 | h |
| 3.59208492151218  | 7.08724266476860  | 6.78074251017886  | h |
| -5.33270257563920 | 8.34729035217757  | 7.23174243047933  | h |
| 5.22835077588340  | 8.27654499371326  | -7.12378722156705 | h |
| 3.46375610490605  | -6.91405674022596 | 6.67546305673728  | h |

## Supplementary Information

|                    |                   |                   |    |
|--------------------|-------------------|-------------------|----|
| 13.75372704199694  | -0.02818982070191 | 5.12426703626334  | c1 |
| -13.75372704199694 | 0.02818982070191  | -5.12426703626334 | c1 |

### [[ClCp<sub>2</sub>ZrC≡CC(NDipp)<sub>2</sub>]<sub>2</sub>Au<sub>2</sub>] 2 (singlet ground state)

|                    |                    |                   |    |
|--------------------|--------------------|-------------------|----|
| -14.16429064362443 | 0.03138380389666   | -0.95849977104574 | zr |
| -16.63147232485049 | -4.05280713784394  | -1.45306090068553 | c  |
| -17.17157345196932 | -3.09658803990183  | 1.01138400370603  | c  |
| -14.89231319116316 | -3.22350110468262  | 2.47038989966274  | c  |
| -12.96388290218692 | -4.28341229560778  | 0.91188239102921  | c  |
| -14.02743302430296 | -4.75664483214776  | -1.52016565013819 | c  |
| -17.96814028954627 | -4.17765314076703  | -3.03662450666191 | h  |
| -19.02448979688185 | -2.44929959852746  | 1.68550617933708  | h  |
| -14.67337763754749 | -2.66210156704836  | 4.45622118797082  | h  |
| -10.99873593670513 | -4.65836233645752  | 1.45644333033545  | h  |
| -12.99010280901213 | -5.49317838692413  | -3.15886286812403 | h  |
| -0.01377439365904  | -2.64011361194655  | 0.08913375517171  | au |
| -3.89007774015502  | -2.23011899819622  | 0.25409903688024  | n  |
| -5.04935042252387  | 0.04067822817126   | 0.16396369357132  | c  |
| -7.74612987754114  | 0.04569235547972   | -0.00519288243166 | c  |
| -10.06623141622750 | 0.05291180610512   | -0.31871201589183 | c  |
| -7.31519951776256  | -8.11738130866905  | 2.11711319812785  | c  |
| -5.96549912319012  | -5.83265814885510  | 2.32985629534197  | c  |
| -5.39337632167803  | -4.47803375947933  | 0.08709352297247  | c  |
| -6.17400246486036  | -5.36280545526288  | -2.32612429548561 | c  |
| -7.52092348634175  | -7.65388769488933  | -2.44282518768097 | c  |
| -8.08446100312020  | -9.03151682977597  | -0.24809815015975 | c  |
| -7.79580981599552  | -9.18907303952367  | 3.83747098467683  | h  |
| -8.13478898403840  | -8.38565522565235  | -4.29468234527054 | h  |
| -9.14240919272213  | -10.82036836909735 | -0.38180907197414 | h  |
| -5.27425133456125  | -4.75564314826488  | 4.90908381162369  | c  |
| -7.65864661297234  | -3.63082966105951  | 6.16494901700190  | c  |
| -9.06508018053957  | -5.14111982961590  | 6.57971460105150  | h  |
| -7.17627320579097  | -2.67142800758385  | 7.97400977521083  | h  |
| -8.57721402489891  | -2.22833404739352  | 4.89979411342248  | h  |
| -3.95220576056303  | -6.68373822459503  | 6.64219551790585  | c  |
| -3.92848769090494  | -3.17789324058293  | 4.58037991968220  | h  |
| -3.30076078391848  | -5.75109833687700  | 8.41125425705516  | h  |
| -2.27290653150499  | -7.52508819450258  | 5.70137664673539  | h  |
| -5.23745083695515  | -8.25526942837338  | 7.19792248658505  | h  |
| -5.49773493197128  | -3.92085424326643  | -4.72726798478125 | c  |
| -3.23632436319647  | -5.19486361383545  | -6.05677413615456 | c  |
| -7.77695402300462  | -3.55356786137346  | -6.49549890721164 | c  |
| -3.70107602450289  | -7.16171718668026  | -6.63931532058758 | h  |
| -8.48802128231548  | -5.37551307178606  | -7.26929722753482 | h  |
| -2.67079308793390  | -4.11990246282282  | -7.77501586882566 | h  |
| -7.24408175105099  | -2.35361189288924  | -8.13691125691400 | h  |
| -1.57286305442921  | -5.27850552614086  | -4.76929223094418 | h  |
| -9.35960846569048  | -2.60032148622632  | -5.49497115922998 | h  |
| -4.85787214997866  | -2.00700048504937  | -4.15787317115851 | h  |
| 14.16429064362443  | -0.03138380389666  | 0.95849977104574  | zr |
| 16.62912127859122  | -4.14651980266364  | 1.29455157026523  | c  |
| -17.24074325789143 | 3.02431875606920   | 1.08254926345596  | c  |
| 17.17157345196932  | 3.09658803990183   | -1.01138400370603 | c  |
| -16.62912127859122 | 4.14651980266364   | -1.29455157026523 | c  |
| 16.63147232485049  | 4.05280713784394   | 1.45306090068553  | c  |
| 17.24074325789143  | -3.02431875606920  | -1.08254926345596 | c  |

## Supplementary Information

|                    |                    |                   |    |
|--------------------|--------------------|-------------------|----|
| 15.00925643395786  | -3.06835004656081  | -2.62004831919077 | c  |
| -14.03037094015807 | 4.86315278116257   | -1.23273274503588 | c  |
| 14.02743302430296  | 4.75664483214776   | 1.52016565013819  | c  |
| -15.00925643395786 | 3.06835004656081   | 2.62004831919077  | c  |
| 14.89231319116316  | 3.22350110468262   | -2.47038989966274 | c  |
| 14.03037094015807  | -4.86315278116257  | 1.23273274503588  | c  |
| 13.03866344138564  | -4.23359276910448  | -1.19646019386019 | c  |
| -13.03866344138564 | 4.23359276910448   | 1.19646019386019  | c  |
| 12.96388290218692  | 4.28341229560778   | -0.91188239102921 | c  |
| 17.90846983063291  | -4.36395343258197  | 2.91397393092470  | h  |
| -19.10804830555609 | 2.32635265571024   | 1.65879772021197  | h  |
| 19.02448979688185  | 2.44929959852746   | -1.68550617933708 | h  |
| -17.90846983063291 | 4.36395343258197   | -2.91397393092470 | h  |
| 17.96814028954627  | 4.17765314076703   | 3.03662450666191  | h  |
| 19.10804830555609  | -2.32635265571024  | -1.65879772021197 | h  |
| 14.85933239885614  | -2.38271277669441  | -4.57308978986249 | h  |
| -12.94311573078365 | 5.70554831740035   | -2.78592496372125 | h  |
| 12.99010280901213  | 5.49317838692413   | 3.15886286812403  | h  |
| -14.85933239885614 | 2.38271277669441   | 4.57308978986249  | h  |
| 14.67337763754749  | 2.66210156704836   | -4.45622118797082 | h  |
| 12.94311573078365  | -5.70554831740035  | 2.78592496372125  | h  |
| 11.09194247966130  | -4.57995857211108  | -1.82264134975622 | h  |
| -11.09194247966130 | 4.57995857211108   | 1.82264134975622  | h  |
| 10.99873593670513  | 4.65836233645752   | -1.45644333033545 | h  |
| 0.01377439365904   | 2.64011361194655   | -0.08913375517171 | au |
| 3.86938151103607   | -2.30277948291551  | -0.13309685050043 | n  |
| -3.86938151103607  | 2.30277948291551   | 0.13309685050043  | n  |
| 3.89007774015502   | 2.23011899819622   | -0.25409903688024 | n  |
| 5.04935042252387   | -0.04067822817126  | -0.16396369357132 | c  |
| 7.74612987754114   | -0.04569235547972  | 0.00519288243166  | c  |
| 10.06623141622750  | -0.05291180610512  | 0.31871201589183  | c  |
| 7.25453987116691   | -8.18174805472799  | -2.07780730183661 | c  |
| -7.68267064768422  | 7.65447543006785   | -2.46146763445788 | c  |
| 7.52092348634175   | 7.65388769488933   | 2.44282518768097  | c  |
| -7.25453987116691  | 8.18174805472799   | 2.07780730183661  | c  |
| 7.31519951776256   | 8.11738130866905   | -2.11711319812785 | c  |
| 7.68267064768422   | -7.65447543006785  | 2.46146763445788  | c  |
| 5.83273817119021   | -5.93776020831378  | -2.24645883460587 | c  |
| -6.28034951427056  | 5.39508726845130   | -2.38823552233739 | c  |
| 6.17400246486036   | 5.36280545526288   | 2.32612429548561  | c  |
| -5.83273817119021  | 5.93776020831378   | 2.24645883460587  | c  |
| 5.96549912319012   | 5.83265814885510   | -2.32985629534197 | c  |
| 6.28034951427056   | -5.39508726845130  | 2.38823552233739  | c  |
| 5.37002987934479   | -4.55490051962801  | 0.00495772280749  | c  |
| -5.37002987934479  | 4.55490051962801   | -0.00495772280749 | c  |
| 5.39337632167803   | 4.47803375947933   | -0.08709352297247 | c  |
| 8.17683269981891   | -9.03938588612424  | 0.25376591921463  | c  |
| -8.17683269981891  | 9.03938588612424   | -0.25376591921463 | c  |
| 8.08446100312020   | 9.03151682977597   | 0.24809815015975  | c  |
| 7.65555492930466   | -9.27682603667931  | -3.80374547237066 | h  |
| -8.40216003133654  | 8.35151749552034   | -4.28763064176910 | h  |
| 8.13478898403840   | 8.38565522565235   | 4.29468234527054  | h  |
| -7.65555492930466  | 9.27682603667931   | 3.80374547237066  | h  |
| 7.79580981599552   | 9.18907303952367   | -3.83747098467683 | h  |
| 8.40216003133654   | -8.35151749552034  | 4.28763064176910  | h  |
| 9.28712803582505   | -10.79943697533335 | 0.35286710800066  | h  |
| -9.28712803582505  | 10.79943697533335  | -0.35286710800066 | h  |
| 9.14240919272213   | 10.82036836909735  | 0.38180907197414  | h  |
| 4.91537988042906   | -4.93087496024636  | -4.78445435690545 | c  |



## Supplementary Information

|                   |                   |                   |   |
|-------------------|-------------------|-------------------|---|
| -5.67509629617368 | 3.93555145722450  | -4.79969779815635 | c |
| 5.49773493197128  | 3.92085424326643  | 4.72726798478125  | c |
| -4.91537988042906 | 4.93087496024636  | 4.78445435690545  | c |
| 5.27425133456125  | 4.75564314826488  | -4.90908381162369 | c |
| 5.67509629617368  | -3.93555145722450 | 4.79969779815635  | c |
| 7.06738587895170  | -3.46960409179097 | -6.10294427083817 | c |
| -7.93934660807817 | 3.72571127531717  | -6.60815118726261 | c |
| 7.77695402300462  | 3.55356786137346  | 6.49549890721164  | c |
| -7.06738587895170 | 3.46960409179097  | 6.10294427083817  | c |
| 7.65864661297234  | 3.63082966105951  | -6.16494901700190 | c |
| 7.93934660807817  | -3.72571127531717 | 6.60815118726261  | c |
| 8.65492643246359  | -4.76588535921787 | -6.58620185507686 | h |
| -8.49883994031924 | 5.58855551419394  | -7.41021454381397 | h |
| 8.48802128231548  | 5.37551307178606  | 7.26929722753482  | h |
| -8.65492643246359 | 4.76588535921787  | 6.58620185507686  | h |
| 9.06508018053957  | 5.14111982961590  | -6.57971460105150 | h |
| 8.49883994031924  | -5.58855551419394 | 7.41021454381397  | h |
| 6.39247811657752  | -2.56778407332511 | -7.88072643657570 | h |
| -7.45836987773346 | 2.47608912472286  | -8.22774824651098 | h |
| 7.24408175105099  | 2.35361189288924  | 8.13691125691400  | h |
| -6.39247811657752 | 2.56778407332511  | 7.88072643657570  | h |
| 7.17627320579097  | 2.67142800758385  | -7.97400977521083 | h |
| 7.45836987773346  | -2.47608912472286 | 8.22774824651098  | h |
| 7.82676689875653  | -1.96508705751270 | -4.85069394625269 | h |
| -9.60774682649285 | 2.89422057875644  | -5.63850204033715 | h |
| 9.35960846569048  | 2.60032148622632  | 5.49497115922998  | h |
| -7.82676689875653 | 1.96508705751270  | 4.85069394625269  | h |
| 8.57721402489891  | 2.22833404739352  | -4.89979411342248 | h |
| 9.60774682649285  | -2.89422057875644 | 5.63850204033715  | h |
| 3.79730954944979  | -6.98564519596520 | -6.51043533851376 | c |
| -3.32371759435305 | 5.07630866752621  | -6.09703095192433 | c |
| 3.23632436319647  | 5.19486361383545  | 6.05677413615456  | c |
| -3.79730954944979 | 6.98564519596520  | 6.51043533851376  | c |
| 3.95220576056303  | 6.68373822459503  | -6.64219551790585 | c |
| 3.32371759435305  | -5.07630866752621 | 6.09703095192433  | c |
| 3.38251311138513  | -3.55304337010987 | -4.37997724518438 | h |
| -5.16753173253449 | 1.97916657308746  | -4.24342408387699 | h |
| 4.85787214997866  | 2.00700048504937  | 4.15787317115851  | h |
| -3.38251311138513 | 3.55304337010987  | 4.37997724518438  | h |
| 3.92848769090494  | 3.17789324058293  | -4.58037991968220 | h |
| 5.16753173253449  | -1.97916657308746 | 4.24342408387699  | h |
| 2.91886637841254  | -6.10986908544283 | -8.20791316993282 | h |
| -2.81339432693954 | 3.98046078851720  | -7.81979363949019 | h |
| 2.67079308793390  | 4.11990246282282  | 7.77501586882566  | h |
| -2.91886637841254 | 6.10986908544283  | 8.20791316993282  | h |
| 3.30076078391848  | 5.75109833687700  | -8.41125425705516 | h |
| 2.81339432693954  | -3.98046078851720 | 7.81979363949019  | h |
| 2.31323265166738  | -8.08714839831337 | -5.51047487432944 | h |
| -1.66505969034692 | 5.05056187943407  | -4.80113229766855 | h |
| 1.57286305442921  | 5.27850552614086  | 4.76929223094418  | h |
| -2.31323265166738 | 8.08714839831337  | 5.51047487432944  | h |
| 2.27290653150499  | 7.52508819450258  | -5.70137664673539 | h |
| 1.66505969034692  | -5.05056187943407 | 4.80113229766855  | h |
| 5.26099216267459  | -8.33571952867484 | -7.18972187772026 | h |
| -3.66915427019992 | 7.07210381616773  | -6.66498213581840 | h |
| 3.70107602450289  | 7.16171718668026  | 6.63931532058758  | h |
| -5.26099216267459 | 8.33571952867484  | 7.18972187772026  | h |
| 5.23745083695515  | 8.25526942837338  | -7.19792248658505 | h |
| 3.66915427019992  | -7.07210381616773 | 6.66498213581840  | h |

## Supplementary Information

|                    |                   |                   |    |
|--------------------|-------------------|-------------------|----|
| 14.33554427846709  | -0.14377668898358 | 5.55991413442110  | c1 |
| -14.33554427846709 | 0.14377668898358  | -5.55991413442110 | c1 |

### [[ClCp<sub>2</sub>ZrC≡CC(NDipp)<sub>2</sub>Au<sub>2</sub>] 2 (triplet state)

|                    |                    |                   |    |
|--------------------|--------------------|-------------------|----|
| -14.17084090076306 | 0.06646879207972   | -1.06857266619108 | zr |
| -17.38568398559682 | -3.35829923944908  | -0.23325713998465 | c  |
| -16.44987690882851 | -2.56309477294796  | 2.18229331266201  | c  |
| -13.85633209453693 | -3.27289541434004  | 2.34566806817820  | c  |
| -13.19493654702612 | -4.55461731130029  | 0.04843600888764  | c  |
| -15.37219164981147 | -4.61500725286871  | -1.52345444594185 | c  |
| -19.31814472660316 | -3.09365094863893  | -0.94798280167437 | h  |
| -17.54530387992813 | -1.58881373716817  | 3.65138122820859  | h  |
| -12.57308020476404 | -2.92539754972773  | 3.93894668705535  | h  |
| -11.32015416469693 | -5.31213504266135  | -0.41818202891474 | h  |
| -15.46369967940852 | -5.39713898156432  | -3.44150037047746 | h  |
| 0.04061422334943   | -2.59238049276562  | -0.01650750419574 | au |
| -3.81350726732950  | -2.32665593787769  | 0.21674879475164  | n  |
| -5.09376786551041  | -0.08192262756154  | 0.09301847879348  | c  |
| -7.73634775048124  | -0.09883717733200  | -0.17428229904860 | c  |
| -10.06617345804582 | -0.01985875968779  | -0.54949590428803 | c  |
| -6.85648867464664  | -8.41702464338214  | 1.99302771907226  | c  |
| -5.56555103751311  | -6.10509511094362  | 2.22593658376206  | c  |
| -5.21427946005042  | -4.62803554386003  | 0.00765730405171  | c  |
| -6.09873224402865  | -5.43735413153500  | -2.39850576967793 | c  |
| -7.35063249420977  | -7.78010630079018  | -2.53121815871174 | c  |
| -7.73779114060320  | -9.25641287128253  | -0.36276068871592 | c  |
| -7.18936599102408  | -9.58359026134687  | 3.68426820552983  | h  |
| -8.03831001108369  | -8.46709845999712  | -4.37230965020521 | h  |
| -8.74277231248201  | -11.07514367698243 | -0.50886844249850 | h  |
| -4.71527921153067  | -5.09583513660237  | 4.78642333635920  | c  |
| -6.87116974860112  | -3.53624540100169  | 5.98458239756384  | c  |
| -8.52002223983104  | -4.77336841839704  | 6.40997553252943  | h  |
| -6.24491633040496  | -2.63465852987708  | 7.77946891940425  | h  |
| -7.52623632447098  | -2.02777770027629  | 4.67912768150300  | h  |
| -3.74184692600541  | -7.15047116564777  | 6.59684838662750  | c  |
| -3.12346681399066  | -3.76957122035743  | 4.43182713954393  | h  |
| -2.88208189724059  | -6.26443776853753  | 8.29792688072836  | h  |
| -2.27573816617387  | -8.34368252472428  | 5.67905942816997  | h  |
| -5.28451316706640  | -8.41341073767044  | 7.26703365363106  | h  |
| -5.57107508613734  | -3.90782566935018  | -4.78150796907018 | c  |
| -3.24195975619960  | -4.98974510801977  | -6.16591671767933 | c  |
| -7.89287338826613  | -3.68905321502306  | -6.51462131057672 | c  |
| -3.58425035295897  | -6.96764459975927  | -6.79416211785245 | h  |
| -8.44494121804030  | -5.54248642724536  | -7.34235667275141 | h  |
| -2.77920170329719  | -3.83389243826982  | -7.86175170165820 | h  |
| -7.47956266070797  | -2.39552254757604  | -8.11718470270457 | h  |
| -1.55227780486803  | -4.99710963149200  | -4.90951380228635 | h  |
| -9.54346157455452  | -2.90862700076832  | -5.47608957369757 | h  |
| -5.07040657853801  | -1.95796152061689  | -4.19698306288962 | h  |
| 14.17084090076306  | -0.06646879207972  | 1.06857266619108  | zr |
| 16.51300200448634  | -4.18256727185205  | 1.83264596415823  | c  |
| -17.18667890986433 | 3.32951250922270   | 0.63715278775820  | c  |
| 16.44987690882851  | 2.56309477294796   | -2.18229331266201 | c  |
| -16.51300200448634 | 4.18256727185205   | -1.83264596415823 | c  |
| 17.38568398559682  | 3.35829923944908   | 0.23325713998465  | c  |
| 17.18667890986433  | -3.32951250922270  | -0.63715278775820 | c  |
| 14.97723325199667  | -3.46783672070560  | -2.20003784167829 | c  |

## Supplementary Information

|                    |                    |                   |    |
|--------------------|--------------------|-------------------|----|
| -13.88917583770903 | 4.82607420473334   | -1.80046217486030 | c  |
| 15.37219164981147  | 4.61500725286871   | 1.52345444594185  | c  |
| -14.97723325199667 | 3.46783672070560   | 2.20003784167829  | c  |
| 13.85633209453693  | 3.27289541434004   | -2.34566806817820 | c  |
| 13.88917583770903  | -4.82607420473334  | 1.80046217486030  | c  |
| 12.95314015200577  | -4.41768382205374  | -0.69677886835311 | c  |
| -12.95314015200577 | 4.41768382205374   | 0.69677886835311  | c  |
| 13.19493654702612  | 4.55461731130029   | -0.04843600888764 | c  |
| 17.76588296476861  | -4.27159083768508  | 3.48428282710976  | h  |
| -19.07567885692840 | 2.71245614701622   | 1.24005535242645  | h  |
| 17.54530387992813  | 1.58881373716817   | -3.65138122820859 | h  |
| -17.76588296476861 | 4.27159083768508   | -3.48428282710976 | h  |
| 19.31814472660316  | 3.09365094863893   | 0.94798280167437  | h  |
| 19.07567885692840  | -2.71245614701622  | -1.24005535242645 | h  |
| 14.86159278402990  | -2.95573611122479  | -4.20888646295159 | h  |
| -12.76168459877606 | 5.47871158568343   | -3.41447560501504 | h  |
| 15.46369967940852  | 5.39713898156432   | 3.44150037047746  | h  |
| -14.86159278402990 | 2.95573611122479   | 4.20888646295159  | h  |
| 12.57308020476404  | 2.92539754972773   | -3.93894668705535 | h  |
| 12.76168459877606  | -5.47871158568343  | 3.41447560501504  | h  |
| 11.00607861488163  | -4.75424370601762  | -1.32250848864408 | h  |
| -11.00607861488163 | 4.75424370601762   | 1.32250848864408  | h  |
| 11.32015416469693  | 5.31213504266135   | 0.41818202891474  | h  |
| -0.04061422334943  | 2.59238049276562   | 0.01650750419574  | au |
| 3.87897011795631   | -2.19786635249602  | -0.23318297181184 | n  |
| -3.87897011795631  | 2.19786635249602   | 0.23318297181184  | n  |
| 3.81350726732950   | 2.32665593787769   | -0.21674879475164 | n  |
| 5.09376786551041   | 0.08192262756154   | -0.09301847879348 | c  |
| 7.73634775048124   | 0.09883717733200   | 0.17428229904860  | c  |
| 10.06617345804582  | 0.01985875968779   | 0.54949590428803  | c  |
| 7.20628550887696   | -8.14164866299006  | -2.02639147282683 | c  |
| -7.42694510661611  | 7.63449831472590   | -2.53219009781775 | c  |
| 7.35063249420977   | 7.78010630079018   | 2.53121815871174  | c  |
| -7.20628550887696  | 8.14164866299006   | 2.02639147282683  | c  |
| 6.85648867464664   | 8.41702464338214   | -1.99302771907226 | c  |
| 7.42694510661611   | -7.63449831472590  | 2.53219009781775  | c  |
| 5.89313123871911   | -5.84061683079915  | -2.26455676196272 | c  |
| -6.12819175736565  | 5.31841589314798   | -2.39553250670425 | c  |
| 6.09873224402865   | 5.43735413153500   | 2.39850576967793  | c  |
| -5.89313123871911  | 5.84061683079915   | 2.26455676196272  | c  |
| 5.56555103751311   | 6.10509511094362   | -2.22593658376206 | c  |
| 6.12819175736565   | -5.31841589314798  | 2.39553250670425  | c  |
| 5.35273062793511   | -4.45891270320585  | -0.02862937285799 | c  |
| -5.35273062793511  | 4.45891270320585   | 0.02862937285799  | c  |
| 5.21427946005042   | 4.62803554386003   | -0.00765730405171 | c  |
| 7.96056774110882   | -9.04271028441814  | 0.34969271807842  | c  |
| -7.96056774110882  | 9.04271028441814   | -0.34969271807842 | c  |
| 7.73779114060320   | 9.25641287128253   | 0.36276068871592  | c  |
| 7.68120781022775   | -9.23249215239729  | -3.73554944160438 | h  |
| -8.02833478212826  | 8.35864386737674   | -4.39031935847782 | h  |
| 8.03831001108369   | 8.46709845999712   | 4.37230965020521  | h  |
| -7.68120781022775  | 9.23249215239729   | 3.73554944160438  | h  |
| 7.18936599102408   | 9.58359026134687   | -3.68426820552983 | h  |
| 8.02833478212826   | -8.35864386737674  | 4.39031935847782  | h  |
| 8.99277560511850   | -10.84534065995762 | 0.50000839405954  | h  |
| -8.99277560511850  | 10.84534065995762  | -0.50000839405954 | h  |
| 8.74277231248201   | 11.07514367698243  | 0.50886844249850  | h  |
| 5.26350156312300   | -4.74089148328808  | -4.84957661195022 | c  |
| -5.46460568777072  | 3.85325120557729   | -4.78476318658176 | c  |

## Supplementary Information

|                   |                   |                   |    |
|-------------------|-------------------|-------------------|----|
| 5.57107508613734  | 3.90782566935018  | 4.78150796907018  | c  |
| -5.26350156312300 | 4.74089148328808  | 4.84957661195022  | c  |
| 4.71527921153067  | 5.09583513660237  | -4.78642333635920 | c  |
| 5.46460568777072  | -3.85325120557729 | 4.78476318658176  | c  |
| 7.67815436385808  | -3.58770897138051 | -6.02050769763871 | c  |
| -7.76932125019815 | 3.42910949033444  | -6.50607092108419 | c  |
| 7.89287338826613  | 3.68905321502306  | 6.51462131057672  | c  |
| -7.67815436385808 | 3.58770897138051  | 6.02050769763871  | c  |
| 6.87116974860112  | 3.53624540100169  | -5.98458239756384 | c  |
| 7.76932125019815  | -3.42910949033444 | 6.50607092108419  | c  |
| 9.09261042736295  | -5.09097543296862 | -6.43130990824900 | h  |
| -8.53416341733922 | 5.23585384463024  | -7.26565426087916 | h  |
| 8.44494121804030  | 5.54248642724536  | 7.34235667275141  | h  |
| -9.09261042736295 | 5.09097543296862  | 6.43130990824900  | h  |
| 8.52002223983104  | 4.77336841839704  | -6.40997553252943 | h  |
| 8.53416341733922  | -5.23585384463024 | 7.26565426087916  | h  |
| 7.23926310937936  | -2.58964721248148 | -7.81946780867326 | h  |
| -7.23386775200433 | 2.24142292774954  | -8.15488251780730 | h  |
| 7.47956266070797  | 2.39552254757604  | 8.11718470270457  | h  |
| -7.23926310937936 | 2.58964721248148  | 7.81946780867326  | h  |
| 6.24491633040496  | 2.63465852987708  | -7.77946891940425 | h  |
| 7.23386775200433  | -2.24142292774954 | 8.15488251780730  | h  |
| 8.56780761171083  | -2.21634229936307 | -4.70062692910038 | h  |
| -9.31048240386590 | 2.43971549260024  | -5.47728124058429 | h  |
| 9.54346157455452  | 2.90862700076832  | 5.47608957369757  | h  |
| -8.56780761171083 | 2.21634229936307  | 4.70062692910038  | h  |
| 7.52623632447098  | 2.02777770027629  | -4.67912768150300 | h  |
| 9.31048240386590  | -2.43971549260024 | 5.47728124058429  | h  |
| 3.99799889782381  | -6.65455585095456 | -6.63651757296586 | c  |
| -3.24642290646814 | 5.14279398036211  | -6.17235748808719 | c  |
| 3.24195975619960  | 4.98974510801977  | 6.16591671767933  | c  |
| -3.99799889782381 | 6.65455585095456  | 6.63651757296586  | c  |
| 3.74184692600541  | 7.15047116564777  | -6.59684838662750 | c  |
| 3.24642290646814  | -5.14279398036211 | 6.17235748808719  | c  |
| 3.90475451302474  | -3.16861036477331 | -4.54193741692453 | h  |
| -4.78606925264327 | 1.95587798824874  | -4.20282788262088 | h  |
| 5.07040657853801  | 1.95796152061689  | 4.19698306288962  | h  |
| -3.90475451302474 | 3.16861036477331  | 4.54193741692453  | h  |
| 3.12346681399066  | 3.76957122035743  | -4.43182713954393 | h  |
| 4.78606925264327  | -1.95587798824874 | 4.20282788262088  | h  |
| 3.38231903576635  | -5.70453212830984 | -8.40845660220235 | h  |
| -2.67322788863314 | 4.02941425528723  | -7.86294810288557 | h  |
| 2.77920170329719  | 3.83389243826982  | 7.86175170165820  | h  |
| -3.38231903576635 | 5.70453212830984  | 8.40845660220235  | h  |
| 2.88208189724059  | 6.26443776853753  | -8.29792688072836 | h  |
| 2.67322788863314  | -4.02941425528723 | 7.86294810288557  | h  |
| 2.30399033115520  | -7.51872640261804 | -5.74338714507835 | h  |
| -1.57001854193145 | 5.31379161903793  | -4.91095155930395 | h  |
| 1.55227780486803  | 4.99710963149200  | 4.90951380228635  | h  |
| -2.30399033115520 | 7.51872640261804  | 5.74338714507835  | h  |
| 2.27573816617387  | 8.34368252472428  | -5.67905942816997 | h  |
| 1.57001854193145  | -5.31379161903793 | 4.91095155930395  | h  |
| 5.30691151668305  | -8.20815887368119 | -7.18214999991136 | h  |
| -3.76972133597237 | 7.07716729855941  | -6.81107167672502 | h  |
| 3.58425035295897  | 6.96764459975927  | 6.79416211785245  | h  |
| -5.30691151668305 | 8.20815887368119  | 7.18214999991136  | h  |
| 5.28451316706640  | 8.41341073767044  | -7.26703365363106 | h  |
| 3.76972133597237  | -7.07716729855941 | 6.81107167672502  | h  |
| 14.23177511667007 | 0.23673843435097  | 5.72101029158402  | c1 |

## Supplementary Information

-14.23177511667007      -0.23673843435097      -5.72101029158402      c1

**[(PPh<sub>3</sub>)AuC≡CC(NDipp)<sub>2</sub>Au<sub>2</sub>] (singlet ground state)**

|                    |                    |                   |    |
|--------------------|--------------------|-------------------|----|
| -13.23368254572728 | -1.07084765353185  | 1.75875098278005  | au |
| 0.41568910806506   | -2.54738710956562  | -0.49351343981216 | au |
| -3.24282118581515  | -2.97777594648394  | 0.78717446786073  | n  |
| -4.72059003585185  | -1.04694759587074  | 1.55674321536046  | c  |
| -7.29091019933272  | -1.59648571978660  | 2.20573842806274  | c  |
| -9.61272560570888  | -1.74207491017737  | 2.46955144257076  | c  |
| -5.07906688220048  | -9.64670323121924  | 2.16211913406233  | c  |
| -4.05163998761724  | -7.21555033279725  | 2.49976419763024  | c  |
| -4.35680295880215  | -5.42828024046083  | 0.52867737393951  | c  |
| -5.65263370056951  | -6.03797055557146  | -1.74150938687390 | c  |
| -6.64677878293999  | -8.49094822049125  | -1.99620740940525 | c  |
| -6.36892346654834  | -10.28722516926472 | -0.06391385439515 | c  |
| -4.87637701936926  | -11.06382369879053 | 3.67793332895657  | h  |
| -7.66175867285441  | -9.00969502339693  | -3.74213771571586 | h  |
| -7.16674383472929  | -12.19901671636401 | -0.29432393878746 | h  |
| -2.67858620033804  | -6.49393928178684  | 4.92630377450403  | c  |
| -4.49648025621263  | -6.50445502041266  | 7.20277859295251  | c  |
| -5.21017136512212  | -8.44421975967544  | 7.60472046611454  | h  |
| -3.52812536574928  | -5.80228160395114  | 8.93409354071686  | h  |
| -6.15721898321074  | -5.27210996118459  | 6.83208744550544  | h  |
| -0.33667129478241  | -8.16369068285057  | 5.37296050812917  | c  |
| -1.99747000517035  | -4.52327222047845  | 4.68337580951957  | h  |
| 0.74021529445769   | -7.50194678202324  | 7.05535534092221  | h  |
| 0.94984380931981   | -8.09620241809326  | 3.71288587732671  | h  |
| -0.86550897591781  | -10.17475229873449 | 5.70139189942456  | h  |
| -5.91546284596198  | -4.10282530084279  | -3.86297538176492 | c  |
| -4.30288437070667  | -4.86869592418109  | -6.16462192795732 | c  |
| -8.70046659089138  | -3.60586755021869  | -4.55495899945047 | c  |
| -4.94357884510675  | -6.69846432920890  | -6.98259376456057 | h  |
| -9.62770243800524  | -5.31037896284469  | -5.36995680465260 | h  |
| -4.40606378509564  | -3.40686138657677  | -7.67597266286167 | h  |
| -8.84264059669050  | -2.06039173102217  | -5.97792717811689 | h  |
| -2.28554836215650  | -5.07961190333227  | -5.60713959343463 | h  |
| -9.78098005648346  | -3.03051690480151  | -2.84588014877768 | h  |
| -5.12662212682812  | -2.29084764142759  | -3.16392984552861 | h  |
| 13.23368254572728  | 1.07084765353185   | -1.75875098278005 | au |
| -0.41568910806506  | 2.54738710956562   | 0.49351343981216  | au |
| 3.98725034137333   | -1.39940774081510  | -1.63648600386573 | n  |
| -3.98725034137333  | 1.39940774081510   | 1.63648600386573  | n  |
| 3.24282118581515   | 2.97777594648394   | -0.78717446786073 | n  |
| 4.72059003585185   | 1.04694759587074   | -1.55674321536046 | c  |
| 7.29091019933272   | 1.59648571978660   | -2.20573842806274 | c  |
| 9.61272560570888   | 1.74207491017737   | -2.46955144257076 | c  |
| 7.24279163446347   | -6.19524414048902  | -5.65257252414542 | c  |
| -9.22217228221076  | 6.14371968969154   | 1.51053625993327  | c  |
| 6.64677878293999   | 8.49094822049125   | 1.99620740940525  | c  |
| -7.24279163446347  | 6.19524414048902   | 5.65257252414542  | c  |
| 5.07906688220048   | 9.64670323121924   | -2.16211913406233 | c  |
| 9.22217228221076   | -6.14371968969154  | -1.51053625993327 | c  |
| 5.54339042153989   | -4.28548005801845  | -4.91118586370635 | c  |
| -7.57025764176538  | 4.23396156302979   | 0.67911927619278  | c  |
| 5.65263370056951   | 6.03797055557146   | 1.74150938687390  | c  |
| -5.54339042153989  | 4.28548005801845   | 4.91118586370635  | c  |
| 4.05163998761724   | 7.21555033279725   | -2.49976419763024 | c  |

## Supplementary Information

|                    |                   |                   |   |
|--------------------|-------------------|-------------------|---|
| 7.57025764176538   | -4.23396156302979 | -0.67911927619278 | c |
| 5.74280516012674   | -3.30249572758033 | -2.41931865374007 | c |
| -5.74280516012674  | 3.30249572758033  | 2.41931865374007  | c |
| 4.35680295880215   | 5.42828024046083  | -0.52867737393951 | c |
| 9.07513375706733   | -7.11354092688999 | -3.97371061339518 | c |
| -9.07513375706733  | 7.11354092688999  | 3.97371061339518  | c |
| 6.36892346654834   | 10.28722516926472 | 0.06391385439515  | c |
| 7.13630639223851   | -6.98225293738226 | -7.57693584848096 | h |
| -10.66141439192516 | 6.89167649790884  | 0.20860486397545  | h |
| 7.66175867285441   | 9.00969502339693  | 3.74213771571586  | h |
| -7.13630639223851  | 6.98225293738226  | 7.57693584848096  | h |
| 4.87637701936926   | 11.06382369879053 | -3.67793332895657 | h |
| 10.66141439192516  | -6.89167649790884 | -0.20860486397545 | h |
| 10.39118687315090  | -8.61187680918126 | -4.58477593689626 | h |
| -10.39118687315090 | 8.61187680918126  | 4.58477593689626  | h |
| 7.16674383472929   | 12.19901671636401 | 0.29432393878746  | h |
| 3.56535930874732   | -3.22594700396055 | -6.72304478476350 | c |
| -7.69469241132856  | 3.23389252553727  | -2.02684772710077 | c |
| 5.91546284596198   | 4.10282530084279  | 3.86297538176492  | c |
| -3.56535930874732  | 3.22594700396055  | 6.72304478476350  | c |
| 2.67858620033804   | 6.49393928178684  | -4.92630377450403 | c |
| 7.69469241132856   | -3.23389252553727 | 2.02684772710077  | c |
| 4.55516234105989   | -0.82947800975653 | -8.06101170928696 | c |
| -10.34576480592066 | 3.40048308785500  | -3.20500591153784 | c |
| 8.70046659089138   | 3.60586755021869  | 4.55495899945047  | c |
| -4.55516234105989  | 0.82947800975653  | 8.06101170928696  | c |
| 4.49648025621263   | 6.50445502041266  | -7.20277859295251 | c |
| 10.34576480592066  | -3.40048308785500 | 3.20500591153784  | c |
| 6.21904975228311   | -1.28907498823619 | -9.26402636994972 | h |
| -10.92847246460226 | 5.38226601992162  | -3.60298647440338 | h |
| 9.62770243800524   | 5.31037896284469  | 5.36995680465260  | h |
| -6.21904975228311  | 1.28907498823619  | 9.26402636994972  | h |
| 5.21017136512212   | 8.44421975967544  | -7.60472046611454 | h |
| 10.92847246460226  | -5.38226601992162 | 3.60298647440338  | h |
| 3.06525594217167   | 0.00757138881469  | -9.28918572594535 | h |
| -10.39050113279385 | 2.36172405536497  | -5.03172448140463 | h |
| 8.84264059669050   | 2.06039173102217  | 5.97792717811689  | h |
| -3.06525594217167  | -0.00757138881469 | 9.28918572594535  | h |
| 3.52812536574928   | 5.80228160395114  | -8.93409354071686 | h |
| 10.39050113279385  | -2.36172405536497 | 5.03172448140463  | h |
| 5.15861827019313   | 0.63219429029524  | -6.68417138746481 | h |
| -11.78990482573395 | 2.55367132445207  | -1.93351148552261 | h |
| 9.78098005648346   | 3.03051690480151  | 2.84588014877768  | h |
| -5.15861827019313  | -0.63219429029524 | 6.68417138746481  | h |
| 6.15721898321074   | 5.27210996118459  | -6.83208744550544 | h |
| 11.78990482573395  | -2.55367132445207 | 1.93351148552261  | h |
| 2.58004401910406   | -5.16628381343105 | -8.64892922204981 | c |
| -5.72548217356924  | 4.56908273035117  | -3.71423635268912 | c |
| 4.30288437070667   | 4.86869592418109  | 6.16462192795732  | c |
| -2.58004401910406  | 5.16628381343105  | 8.64892922204981  | c |
| 0.33667129478241   | 8.16369068285057  | -5.37296050812917 | c |
| 5.72548217356924   | -4.56908273035117 | 3.71423635268912  | c |
| 1.92220562875873   | -2.63791239851856 | -5.54550538346855 | h |
| -7.18958528022685  | 1.19992706170488  | -1.96650548427419 | h |
| 5.12662212682812   | 2.29084764142759  | 3.16392984552861  | h |
| -1.92220562875873  | 2.63791239851856  | 5.54550538346855  | h |
| 1.99747000517035   | 4.52327222047845  | -4.68337580951957 | h |
| 7.18958528022685   | -1.19992706170488 | 1.96650548427419  | h |
| 0.93332577641313   | -4.37508143723853 | -9.68926608408955 | h |

## Supplementary Information

|                    |                   |                    |   |
|--------------------|-------------------|--------------------|---|
| -5.75600226466760  | 3.78213060275327  | -5.66526375404526  | h |
| 4.40606378509564   | 3.40686138657677  | 7.67597266286167   | h |
| -0.93332577641313  | 4.37508143723853  | 9.68926608408955   | h |
| -0.74021529445769  | 7.50194678202324  | -7.05535534092221  | h |
| 5.75600226466760   | -3.78213060275327 | 5.66526375404526   | h |
| 1.95407045777380   | -6.93634851881195 | -7.70424708143317  | h |
| -3.77968648346123  | 4.32289385615680  | -2.95450981156961  | h |
| 2.28554836215650   | 5.07961190333227  | 5.60713959343463   | h |
| -1.95407045777380  | 6.93634851881195  | 7.70424708143317   | h |
| -0.94984380931981  | 8.09620241809326  | -3.71288587732671  | h |
| 3.77968648346123   | -4.32289385615680 | 2.95450981156961   | h |
| 4.03563604492023   | -5.66861140973794 | -10.08303636333665 | h |
| -6.11613961960526  | 6.63261477929052  | -3.82772185420442  | h |
| 4.94357884510675   | 6.69846432920890  | 6.98259376456057   | h |
| -4.03563604492023  | 5.66861140973794  | 10.08303636333665  | h |
| 0.86550897591781   | 10.17475229873449 | -5.70139189942456  | h |
| 6.11613961960526   | -6.63261477929052 | 3.82772185420442   | h |
| -17.13380041265551 | 0.22076332236645  | 0.16420382734793   | p |
| -17.77416630496100 | -1.21342732631886 | -2.93802534079487  | c |
| -20.22737011723112 | -1.91247543761735 | -3.70924962386582  | c |
| -20.60845822547483 | -2.95750396311138 | -6.12171926172362  | c |
| -18.55246347987719 | -3.30927227087489 | -7.76606911459404  | c |
| -16.10331867019974 | -2.61896985009650 | -6.99642633629694  | c |
| -15.70859749672034 | -1.57949317130100 | -4.59030865543741  | c |
| -21.84405696248373 | -1.65513553157384 | -2.42038241095067  | h |
| -22.52791159877668 | -3.50958138491252 | -6.71428648097949  | h |
| -18.85681960903071 | -4.13981965757750 | -9.65247024304969  | h |
| -14.47675646760090 | -2.90960475113284 | -8.26471923701880  | h |
| -13.78083574221626 | -1.06536894690839 | -3.99178694602963  | h |
| -17.15576140643054 | 3.64580634450279  | -0.42150206818484  | c |
| -19.94653739012859 | -0.42520856820915 | 2.08630811681887   | c |
| -18.41824858482032 | 4.70606493840767  | -2.51728029024896  | c |
| -22.06636534721763 | 1.19184380550775  | 2.09212362308720   | c |
| -18.40182581296557 | 7.33572439016740  | -2.88129284568824  | c |
| -24.19908124775707 | 0.57005560334107  | 3.54617319626916   | c |
| -17.13025884169752 | 8.91286656672508  | -1.16184046780034  | c |
| -24.22461592081149 | -1.65758100751616 | 4.99417446504890   | c |
| -15.86128940265423 | 7.85695519757703  | 0.91994736527622   | c |
| -22.10841726342678 | -3.26561032938416 | 4.99933030335776   | c |
| -15.85851471009006 | 5.23067421816244  | 1.28816058964008   | c |
| -19.96841562347074 | -2.65020629478031 | 3.55752957227452   | c |
| -19.39532446873453 | 3.47212456425133  | -3.88256031853102  | h |
| -22.04573365581732 | 2.94669954750573  | 0.96932828062064   | h |
| -19.37930272193076 | 8.15604395853423  | -4.52800633756780  | h |
| -25.84963903385016 | 1.84125373812629  | 3.55485491722385   | h |
| -17.11078551337467 | 10.97497503735243 | -1.45775153361762  | h |
| -25.89826345498794 | -2.13632106212644 | 6.13888260177743   | h |
| -14.83169661040044 | 9.07943173378357  | 2.25512785130311   | h |
| -22.11469023274934 | -5.00229596406059 | 6.14918850920814   | h |
| -14.79382999299201 | 4.41044645150935  | 2.88198248191221   | h |
| -18.29223175446177 | -3.89090525316439 | 3.58029991018210   | h |
| 17.13380041265551  | -0.22076332236645 | -0.16420382734793  | p |
| 17.77416630496100  | 1.21342732631886  | 2.93802534079487   | c |
| 20.22737011723112  | 1.91247543761735  | 3.70924962386582   | c |
| 20.60845822547483  | 2.95750396311138  | 6.12171926172362   | c |
| 18.55246347987719  | 3.30927227087489  | 7.76606911459404   | c |
| 16.10331867019974  | 2.61896985009650  | 6.99642633629694   | c |
| 15.70859749672034  | 1.57949317130100  | 4.59030865543741   | c |
| 21.84405696248373  | 1.65513553157384  | 2.42038241095067   | h |

## Supplementary Information

|                   |                    |                   |   |
|-------------------|--------------------|-------------------|---|
| 22.52791159877668 | 3.50958138491252   | 6.71428648097949  | h |
| 18.85681960903071 | 4.13981965757750   | 9.65247024304969  | h |
| 14.47675646760090 | 2.90960475113284   | 8.26471923701880  | h |
| 13.78083574221626 | 1.06536894690839   | 3.99178694602963  | h |
| 17.15576140643054 | -3.64580634450279  | 0.42150206818484  | c |
| 19.94653739012859 | 0.42520856820915   | -2.08630811681887 | c |
| 18.41824858482032 | -4.70606493840767  | 2.51728029024896  | c |
| 22.06636534721763 | -1.19184380550775  | -2.09212362308720 | c |
| 18.40182581296557 | -7.33572439016740  | 2.88129284568824  | c |
| 24.19908124775707 | -0.57005560334107  | -3.54617319626916 | c |
| 17.13025884169752 | -8.91286656672508  | 1.16184046780034  | c |
| 24.22461592081149 | 1.65758100751616   | -4.99417446504890 | c |
| 15.86128940265423 | -7.85695519757703  | -0.91994736527622 | c |
| 22.10841726342678 | 3.26561032938416   | -4.99933030335776 | c |
| 15.85851471009006 | -5.23067421816244  | -1.28816058964008 | c |
| 19.96841562347074 | 2.65020629478031   | -3.55752957227452 | c |
| 19.39532446873453 | -3.47212456425133  | 3.88256031853102  | h |
| 22.04573365581732 | -2.94669954750573  | -0.96932828062064 | h |
| 19.37930272193076 | -8.15604395853423  | 4.52800633756780  | h |
| 25.84963903385016 | -1.84125373812629  | -3.55485491722385 | h |
| 17.11078551337467 | -10.97497503735243 | 1.45775153361762  | h |
| 25.89826345498794 | 2.13632106212644   | -6.13888260177743 | h |
| 14.83169661040044 | -9.07943173378357  | -2.25512785130311 | h |
| 22.11469023274934 | 5.00229596406059   | -6.14918850920814 | h |
| 14.79382999299201 | -4.41044645150935  | -2.88198248191221 | h |
| 18.29223175446177 | 3.89090525316439   | -3.58029991018210 | h |

### [(PPh<sub>3</sub>)AuC≡CC(NDipp)<sub>2</sub>Au<sub>2</sub>] (triplet state)

|                    |                    |                   |    |
|--------------------|--------------------|-------------------|----|
| -13.27177703951608 | -0.97275192762990  | 1.65644424558337  | au |
| 0.32427000415103   | -2.46822676636422  | -0.72694802950428 | au |
| -3.29884983438752  | -2.91414206143430  | 0.52155373260655  | n  |
| -4.81026749908544  | -1.01920223831037  | 1.41787292347635  | c  |
| -7.32639625125604  | -1.56456311624054  | 2.10180989813416  | c  |
| -9.66426861632578  | -1.65965350028975  | 2.40094755965574  | c  |
| -4.98421310718088  | -9.58814575947143  | 2.00691493762241  | c  |
| -3.98055461521256  | -7.14115797302230  | 2.29431972740678  | c  |
| -4.38463941173099  | -5.38436216755857  | 0.31359932958003  | c  |
| -5.75004510991225  | -6.01684949489714  | -1.90507770084280 | c  |
| -6.70677683805186  | -8.48867118061548  | -2.10907325529607 | c  |
| -6.33437759042500  | -10.26320096992787 | -0.17251637382966 | c  |
| -4.71598674956205  | -10.98849002210039 | 3.52692172893039  | h  |
| -7.76632690002275  | -9.03920646147935  | -3.81725262067439 | h  |
| -7.10786375392827  | -12.18861990443899 | -0.36312770192534 | h  |
| -2.56746266398478  | -6.36902746754874  | 4.68334909871414  | c  |
| -4.36116922118384  | -6.31895033540308  | 6.97961564774242  | c  |
| -5.07784128488940  | -8.24612131212250  | 7.43098162306243  | h  |
| -3.36861762209910  | -5.58375339751622  | 8.68280290347576  | h  |
| -6.01984495191903  | -5.08731655278362  | 6.59803461020766  | h  |
| -0.22407819160294  | -8.03326070074677  | 5.13916711281654  | c  |
| -1.88156719564848  | -4.40479606964631  | 4.39721070252299  | h  |
| 0.87079824057874   | -7.33566808816060  | 6.79441195815605  | h  |
| 1.04569781811920   | -8.00681874396780  | 3.46435942836924  | h  |
| -0.75096012580622  | -10.03486914290132 | 5.51951851854832  | h  |
| -6.10060747672657  | -4.09801928564602  | -4.02739931462095 | c  |
| -4.54724817618893  | -4.85660202515476  | -6.37302068803291 | c  |
| -8.91045830180378  | -3.64684015945762  | -4.63811790750247 | c  |
| -5.19943769626699  | -6.69269689759667  | -7.16577926945445 | h  |



## Supplementary Information

|                    |                   |                   |    |
|--------------------|-------------------|-------------------|----|
| -9.83796012670341  | -5.37158564182257 | -5.40675996009277 | h  |
| -4.71195423941815  | -3.40058603408467 | -7.88368151497889 | h  |
| -9.11525286151094  | -2.12191462210229 | -6.07391215457569 | h  |
| -2.51114439232989  | -5.05521033315777 | -5.88175137565523 | h  |
| -9.94950226504475  | -3.06592411943474 | -2.90563539776683 | h  |
| -5.31793628509248  | -2.26929254477350 | -3.36131401059185 | h  |
| 13.27177703951608  | 0.97275192762990  | -1.65644424558337 | au |
| -0.32427000415103  | 2.46822676636422  | 0.72694802950428  | au |
| 3.94985800443737   | -1.42431404721388 | -1.64189954934849 | n  |
| -3.94985800443737  | 1.42431404721388  | 1.64189954934849  | n  |
| 3.29884983438752   | 2.91414206143430  | -0.52155373260655 | n  |
| 4.81026749908544   | 1.01920223831037  | -1.41787292347635 | c  |
| 7.32639625125604   | 1.56456311624054  | -2.10180989813416 | c  |
| 9.66426861632578   | 1.65965350028975  | -2.40094755965574 | c  |
| 7.09251554115667   | -6.51357177880021 | -5.33621562073118 | c  |
| -9.15114021623259  | 6.18069793389025  | 1.23949863739829  | c  |
| 6.70677683805186   | 8.48867118061548  | 2.10907325529607  | c  |
| -7.09251554115667  | 6.51357177880021  | 5.33621562073118  | c  |
| 4.98421310718088   | 9.58814575947143  | -2.00691493762241 | c  |
| 9.15114021623259   | -6.18069793389025 | -1.23949863739829 | c  |
| 5.41750075735652   | -4.54677973550983 | -4.71038672380660 | c  |
| -7.53976125986278  | 4.19914729050948  | 0.51211327807212  | c  |
| 5.75004510991225   | 6.01684949489714  | 1.90507770084280  | c  |
| -5.41750075735652  | 4.54677973550983  | 4.71038672380660  | c  |
| 3.98055461521256   | 7.14115797302230  | -2.29431972740678 | c  |
| 7.53976125986278   | -4.19914729050948 | -0.51211327807212 | c  |
| 5.67846312139258   | -3.38410495037643 | -2.29133047722201 | c  |
| -5.67846312139258  | 3.38410495037643  | 2.29133047722201  | c  |
| 4.38463941173099   | 5.38436216755857  | -0.31359932958003 | c  |
| 8.94649890463629   | -7.32249953624851 | -3.62383427657903 | c  |
| -8.94649890463629  | 7.32249953624851  | 3.62383427657903  | c  |
| 6.33437759042500   | 10.26320096992787 | 0.17251637382966  | c  |
| 6.96113444705751   | -7.42647043410702 | -7.20091672681714 | h  |
| -10.60953904113839 | 6.85358705703010  | -0.07985030624224 | h  |
| 7.76632690002275   | 9.03920646147935  | 3.81725262067439  | h  |
| -6.96113444705751  | 7.42647043410702  | 7.20091672681714  | h  |
| 4.71598674956205   | 10.98849002210039 | -3.52692172893039 | h  |
| 10.60953904113839  | -6.85358705703010 | 0.07985030624224  | h  |
| 10.24244938240681  | -8.86835639435738 | -4.14858909480888 | h  |
| -10.24244938240681 | 8.86835639435738  | 4.14858909480888  | h  |
| 7.10786375392827   | 12.18861990443899 | 0.36312770192534  | h  |
| 3.46861757031263   | -3.56095715110392 | -6.59520026117233 | c  |
| -7.69504714045076  | 3.04904142399539  | -2.13176262182551 | c  |
| 6.10060747672657   | 4.09801928564602  | 4.02739931462095  | c  |
| -3.46861757031263  | 3.56095715110392  | 6.59520026117233  | c  |
| 2.56746266398478   | 6.36902746754874  | -4.68334909871414 | c  |
| 7.69504714045076   | -3.04904142399539 | 2.13176262182551  | c  |
| 4.42656944002831   | -1.12967453821461 | -7.89520796708333 | c  |
| -10.27737354587580 | 3.41253249605030  | -3.41280232294285 | c  |
| 8.91045830180378   | 3.64684015945762  | 4.63811790750247  | c  |
| -4.42656944002831  | 1.12967453821461  | 7.89520796708333  | c  |
| 4.36116922118384   | 6.31895033540308  | -6.97961564774242 | c  |
| 10.27737354587580  | -3.41253249605030 | 3.41280232294285  | c  |
| 6.15201157238965   | -1.53155545452895 | -9.02854482397335 | h  |
| -10.63055653106531 | 5.41515804371714  | -3.94955830803529 | h  |
| 9.83796012670341   | 5.37158564182257  | 5.40675996009277  | h  |
| -6.15201157238965  | 1.53155545452895  | 9.02854482397335  | h  |
| 5.07784128488940   | 8.24612131212250  | -7.43098162306243 | h  |
| 10.63055653106531  | -5.41515804371714 | 3.94955830803529  | h  |

## Supplementary Information

|                    |                   |                   |   |
|--------------------|-------------------|-------------------|---|
| 2.95686126380209   | -0.35135179969750 | -9.18412294678815 | h |
| -10.36159934585425 | 2.27456388601519  | -5.17687044657423 | h |
| 9.11525286151094   | 2.12191462210229  | 6.07391215457569  | h |
| -2.95686126380209  | 0.35135179969750  | 9.18412294678815  | h |
| 3.36861762209910   | 5.58375339751622  | -8.68280290347576 | h |
| 10.36159934585425  | -2.27456388601519 | 5.17687044657423  | h |
| 4.92486275982187   | 0.35445134898938  | -6.49896441813887 | h |
| -11.84658314456560 | 2.78846390582436  | -2.16193536408195 | h |
| 9.94950226504475   | 3.06592411943474  | 2.90563539776683  | h |
| -4.92486275982187  | -0.35445134898938 | 6.49896441813887  | h |
| 6.01984495191903   | 5.08731655278362  | -6.59803461020766 | h |
| 11.84658314456560  | -2.78846390582436 | 2.16193536408195  | h |
| 2.61153705986008   | -5.52746741226862 | -8.55371380591528 | c |
| -5.55594448520382  | 4.05072999226864  | -3.84585434210524 | c |
| 4.54724817618893   | 4.85660202515476  | 6.37302068803291  | c |
| -2.61153705986008  | 5.52746741226862  | 8.55371380591528  | c |
| 0.22407819160294   | 8.03326070074677  | -5.13916711281654 | c |
| 5.55594448520382   | -4.05072999226864 | 3.84585434210524  | c |
| 1.75721128432528   | -3.02644292372854 | -5.48596226254403 | h |
| -7.42426360230695  | 0.97983002080621  | -1.92522620040608 | h |
| 5.31793628509248   | 2.26929254477350  | 3.36131401059185  | h |
| -1.75721128432528  | 3.02644292372854  | 5.48596226254403  | h |
| 1.88156719564848   | 4.40479606964631  | -4.39721070252299 | h |
| 7.42426360230695   | -0.97983002080621 | 1.92522620040608  | h |
| 0.98772205815707   | -4.77624121715278 | -9.65675921277062 | h |
| -5.62766846069745  | 3.11808871757764  | -5.72960846781730 | h |
| 4.71195423941815   | 3.40058603408467  | 7.88368151497889  | h |
| -0.98772205815707  | 4.77624121715278  | 9.65675921277062  | h |
| -0.87079824057874  | 7.33566808816060  | -6.79441195815605 | h |
| 5.62766846069745   | -3.11808871757764 | 5.72960846781730  | h |
| 1.99409837844003   | -7.31371051793250 | -7.63460616399947 | h |
| -3.65643453097804  | 3.68080557865952  | -3.02491031612080 | h |
| 2.51114439232989   | 5.05521033315777  | 5.88175137565523  | h |
| -1.99409837844003  | 7.31371051793250  | 7.63460616399947  | h |
| -1.04569781811920  | 8.00681874396780  | -3.46435942836924 | h |
| 3.65643453097804   | -3.68080557865952 | 3.02491031612080  | h |
| 4.13391057140114   | -5.98625924603158 | -9.93057519148083 | h |
| -5.73735171592028  | 6.12545473064223  | -4.13057772268100 | h |
| 5.19943769626699   | 6.69269689759667  | 7.16577926945445  | h |
| -4.13391057140114  | 5.98625924603158  | 9.93057519148083  | h |
| 0.75096012580622   | 10.03486914290132 | -5.51951851854832 | h |
| 5.73735171592028   | -6.12545473064223 | 4.13057772268100  | h |
| -17.22642893606009 | 0.27392503386470  | 0.14419865705716  | p |
| -17.85572306789629 | -1.15702620014904 | -2.97330509096266 | c |
| -20.32224453113512 | -1.79694330223733 | -3.76140511456381 | c |
| -20.72473934648429 | -2.78672422805081 | -6.19233340375159 | c |
| -18.67668643314389 | -3.14538077177660 | -7.84754762099461 | c |
| -16.21530084429900 | -2.51207357473662 | -7.06472164965835 | c |
| -15.80338933247833 | -1.51987266853635 | -4.64175647515073 | c |
| -21.93014724773126 | -1.53700676912651 | -2.46127801963254 | h |
| -22.65516050756272 | -3.29050636179620 | -6.79381573353179 | h |
| -18.99850588943080 | -3.92833069820003 | -9.75154137649002 | h |
| -14.59557411314277 | -2.80553945418163 | -8.34230267897659 | h |
| -13.87118609653414 | -1.03553217820315 | -4.03170995668742 | h |
| -17.33225873583075 | 3.69253235126294  | -0.36943705810777 | c |
| -20.02905924046492 | -0.52744004677568 | 2.02759646285139  | c |
| -18.95848976148575 | 4.76549707178173  | -2.20585532619064 | c |
| -21.88739382602880 | 1.26771593497256  | 2.69493127885912  | c |
| -19.02641772046326 | 7.39572486052568  | -2.54579476705894 | c |

## Supplementary Information

|                    |                    |                   |   |
|--------------------|--------------------|-------------------|---|
| -23.95148454655316 | 0.54339567365677   | 4.19905811932768  | c |
| -17.48482652749845 | 8.98172718164154   | -1.07148748393097 | c |
| -24.17964973462283 | -1.96588640962473  | 5.04932894770034  | c |
| -15.85793211973677 | 7.91872029493133   | 0.75139655764114  | c |
| -22.32070292861253 | -3.75652038736935  | 4.39801303199333  | c |
| -15.77293152182916 | 5.29334023098749   | 1.09736616973047  | c |
| -20.24879040241211 | -3.04383635996334  | 2.90931119601627  | c |
| -20.15633514625705 | 3.53400492855182   | -3.38461073943145 | h |
| -21.71584731066655 | 3.23734019676493   | 2.03913866320324  | h |
| -20.29050105603035 | 8.21471391636732   | -3.98610165746793 | h |
| -25.39660167854369 | 1.95489174579835   | 4.71017092319114  | h |
| -17.54028152841794 | 11.04564299539766  | -1.34757404549052 | h |
| -25.79863806170432 | -2.52587488483122  | 6.23455298928040  | h |
| -14.63603790479540 | 9.14549853495473   | 1.91038979751029  | h |
| -22.48188905101376 | -5.72229347966375  | 5.07028996141726  | h |
| -14.46293828941002 | 4.47651910548857   | 2.50011041122353  | h |
| -18.77784253498655 | -4.44134988539428  | 2.42504202101554  | h |
| 17.22642893606009  | -0.27392503386470  | -0.14419865705716 | p |
| 17.85572306789629  | 1.15702620014904   | 2.97330509096266  | c |
| 20.32224453113512  | 1.79694330223733   | 3.76140511456381  | c |
| 20.72473934648429  | 2.78672422805081   | 6.19233340375159  | c |
| 18.67668643314389  | 3.14538077177660   | 7.84754762099461  | c |
| 16.21530084429900  | 2.51207357473662   | 7.06472164965835  | c |
| 15.80338933247833  | 1.51987266853635   | 4.64175647515073  | c |
| 21.93014724773126  | 1.53700676912651   | 2.46127801963254  | h |
| 22.65516050756272  | 3.29050636179620   | 6.79381573353179  | h |
| 18.99850588943080  | 3.92833069820003   | 9.75154137649002  | h |
| 14.59557411314277  | 2.80553945418163   | 8.34230267897659  | h |
| 13.87118609653414  | 1.03553217820315   | 4.03170995668742  | h |
| 17.33225873583075  | -3.69253235126294  | 0.36943705810777  | c |
| 20.02905924046492  | 0.52744004677568   | -2.02759646285139 | c |
| 18.95848976148575  | -4.76549707178173  | 2.20585532619064  | c |
| 21.88739382602880  | -1.26771593497256  | -2.69493127885912 | c |
| 19.02641772046326  | -7.39572486052568  | 2.54579476705894  | c |
| 23.95148454655316  | -0.54339567365677  | -4.19905811932768 | c |
| 17.48482652749845  | -8.98172718164154  | 1.07148748393097  | c |
| 24.17964973462283  | 1.96588640962473   | -5.04932894770034 | c |
| 15.85793211973677  | -7.91872029493133  | -0.75139655764114 | c |
| 22.32070292861253  | 3.75652038736935   | -4.39801303199333 | c |
| 15.77293152182916  | -5.29334023098749  | -1.09736616973047 | c |
| 20.24879040241211  | 3.04383635996334   | -2.90931119601627 | c |
| 20.15633514625705  | -3.53400492855182  | 3.38461073943145  | h |
| 21.71584731066655  | -3.23734019676493  | -2.03913866320324 | h |
| 20.29050105603035  | -8.21471391636732  | 3.98610165746793  | h |
| 25.39660167854369  | -1.95489174579835  | -4.71017092319114 | h |
| 17.54028152841794  | -11.04564299539766 | 1.34757404549052  | h |
| 25.79863806170432  | 2.52587488483122   | -6.23455298928040 | h |
| 14.63603790479540  | -9.14549853495473  | -1.91038979751029 | h |
| 22.48188905101376  | 5.72229347966375   | -5.07028996141726 | h |
| 14.46293828941002  | -4.47651910548857  | -2.50011041122353 | h |
| 18.77784253498655  | 4.44134988539428   | -2.42504202101554 | h |

### X. References

1. T. J. Feuerstein, M. Poß, T. P. Seifert, S. Bestgen, C. Feldmann and P. W. Roesky, *Chem. Commun.*, 2017, **53**, 9012-9015.
2. T. J. Feuerstein, T. P. Seifert, A. P. Jung, R. Müller, S. Lebedkin, M. M. Kappes and P. W. Roesky, *Chem. Eur. J.*, 2020, **26**, 16676-16682.
3. G. M. Sheldrick, *Acta Crystallogr A*, 2008, **64**, 112-122.
4. G. M. Sheldrick, *Acta Crystallogr. Sect. C*, 2015, **71**, 3-8.
5. O. V. Dolomanov, L. J. Bourhis, R. J. Gildea, J. A. K. Howard and H. Puschmann, *J. Appl. Crystallogr.*, 2009, **42**, 339-341.
6. J. C. de Mello, H. F. Wittmann and R. H. Friend, *Adv. Mater.*, 1997, **9**, 230-232.
7. R. Ahlrichs, M. Bär, M. Häser, H. Horn and C. Kölmel, *Chem. Phys. Lett.*, 1989, **162**, 165-169.
8. A. D. Becke, *Phys. Rev. A*, 1988, **38**, 3098-3100.
9. J. P. Perdew, *Phys. Rev. B*, 1986, **34**, 7406-7406.
10. J. P. Perdew, *Phys. Rev. B*, 1986, **33**, 8822-8824.
11. S. Grimme, J. Antony, S. Ehrlich and H. Krieg, *J. Chem. Phys.*, 2010, **132**, 154104.
12. F. Weigend, M. Häser, H. Patzelt and R. Ahlrichs, *Chem. Phys. Lett.*, 1998, **294**, 143-152.
